1 **Redefining the role of Ca<sup>2+</sup>-permeable channels in hereditary photoreceptor**  
2 **degeneration using the D- and L-cis enantiomers of diltiazem**

3  
4 Soumyaparna Das<sup>1</sup>, Valerie Popp<sup>2</sup>, Michael Power<sup>1,3</sup>, Kathrin Groeneveld<sup>2,4</sup>, Christian  
5 Melle<sup>4</sup>, Luke Rogerson<sup>3</sup>, Marily Achury<sup>1</sup>, Frank Schwede<sup>5</sup>, Torsten Strasser<sup>1</sup>, Thomas  
6 Euler<sup>1,3</sup>, François Paquet-Durand<sup>1\*</sup> and Vasilica Nache<sup>2\*</sup>

7  
8 <sup>1</sup> Institute for Ophthalmic Research, University of Tübingen, 72076 Tübingen, Germany

9 <sup>2</sup> Institute of Physiology II, University Hospital Jena, Friedrich Schiller University Jena,  
10 07743 Jena, Germany

11 <sup>3</sup> Werner Reichardt Centre for Integrative Neuroscience (CIN), University of Tübingen,  
12 72076 Tübingen, Germany

13 <sup>4</sup> Biomolecular Photonics Group, University Hospital Jena, Friedrich Schiller University  
14 Jena, 07743 Jena, Germany

15  
16 <sup>5</sup> BIOLOG Life Science Institute, 28199 Bremen, Germany

17  
18

19 **Corresponding authors \***

20 François Paquet-Durand

21 Institute for Ophthalmic Research, University of Tübingen, 72076 Tübingen, Germany

22 E-Mail: [francois.paquet-durand@uni-tuebingen.de](mailto:francois.paquet-durand@uni-tuebingen.de)

23

24 Vasilica Nache

25 Institute of Physiology II, University Hospital Jena, Friedrich Schiller University Jena,  
26 07743 Jena, Germany

27 E-Mail: [Vasilica.Nache@med.uni-jena.de](mailto:Vasilica.Nache@med.uni-jena.de)

28

29 **ABSTRACT**

30 Hereditary degeneration of photoreceptors has been linked to over-activation of Ca<sup>2+</sup>-  
31 permeable channels, excessive Ca<sup>2+</sup>-influx, and downstream activation of Ca<sup>2+</sup>-  
32 dependent calpain-type proteases. Unfortunately, after more than 20 years of pertinent  
33 research, unequivocal evidence proving significant and reproducible photoreceptor  
34 protection with Ca<sup>2+</sup>-channel blockers is still lacking. Here, we show that both D- and L-  
35 cis enantiomers of the anti-hypertensive drug diltiazem were highly effective at blocking  
36 photoreceptor Ca<sup>2+</sup>-influx, most probably by blocking the pores of Ca<sup>2+</sup>-permeable  
37 channels. Yet, unexpectedly, this block neither reduced activity of calpain-type  
38 proteases, nor did it result in photoreceptor protection. Remarkably, application of the L-  
39 cis enantiomer of diltiazem even led to a strong increase in photoreceptor cell death.  
40 These findings shed doubt on the previously proposed links between Ca<sup>2+</sup> and retinal  
41 degeneration and are highly relevant for future therapy development as they may serve  
42 to refocus research efforts towards alternative, Ca<sup>2+</sup>-independent degenerative  
43 mechanisms.

44

45

## 46 I. INTRODUCTION

47 The retina harbours two different types of photoreceptors: rods and cones. Rods  
48 respond to dim light and enable night-time vision, whereas cones respond to bright  
49 daylight and enable colour vision. *Retinitis pigmentosa* (RP) is a group of hereditary  
50 diseases of the retina where a primary degeneration of rods is followed by a secondary  
51 loss of cones, eventually leading to complete blindness [1, 2]. *Achromatopsia* (ACHM) is  
52 a related disease where the genetic defect causes cone degeneration without significant  
53 rod loss [3]. Overall, hereditary retinal diseases can be caused by mutations in more than  
54 270 identified genes (<https://sph.uth.edu/retnet/sum-dis.htm#B-diseases>, information  
55 retrieved in Nov. 2020). Unfortunately, most cases of hereditary retinal degeneration  
56 remain without effective treatment.

57 Disease-causing mutations often trigger cGMP-dependent cell death in  
58 photoreceptors [4, 5]. In both rods and cones, cGMP homeostasis is regulated by two  
59 main enzymes: guanylyl cyclase, which produces cGMP, and phosphodiesterase-6  
60 (PDE6), which hydrolyses cGMP. In turn, cGMP activates the cyclic nucleotide-gated  
61 channel (CNGC), which is located mostly in the photoreceptor outer segment (OS) [6].

62 In darkness, cGMP binds and activates CNGCs, leading to an influx of  $\text{Ca}^{2+}$  and  $\text{Na}^{+}$   
63 ions. This influx is countered by a cation efflux mediated by the  $\text{Na}^{+}\text{-Ca}^{2+}\text{-K}^{+}$ -exchanger  
64 (NCKX) in the OS and by the ATP-driven  $\text{Na}^{+}\text{-K}^{+}$ -exchanger (NKX) in the photoreceptor  
65 inner segment (IS) [7]. Under physiological conditions, NKX alone is responsible for at  
66 least 50% of photoreceptor ATP-consumption [8]. In both cell body and synapse,  $\text{Ca}^{2+}$  is  
67 extruded by the plasma membrane  $\text{Ca}^{2+}\text{-ATPase}$  (PMCA). This constant flux of cations  
68 across the photoreceptor membrane in darkness is commonly referred to as the dark  
69 current, keeping the cell in a depolarized state with a membrane potential of approx. -35  
70 mV [9, 10]. The photoreceptor depolarization allows for activation of  $\text{Ca}_v1.4$  (L-type)  
71 voltage-gated  $\text{Ca}^{2+}$ -channels (VGCCs), located in the cell body and synapse, where they  
72 mediate further  $\text{Ca}^{2+}$  influx and continuous glutamate release at the synaptic terminal [9,  
73 10].

74 In light, PDE6 rapidly hydrolyses cGMP, leading to CNGC closure,  $\text{Ca}^{2+}$  decrease,  
75 and hyperpolarization of the photoreceptor due to continued activity of NCKX and NKX.  
76 This in turn closes VGCC, ending synaptic glutamate release. Independent of VGCC, in  
77 the photoreceptor cell body, low  $\text{Ca}^{2+}$  levels may trigger store-operated  $\text{Ca}^{2+}$  entry  
78 (SOCE) via  $\text{Ca}^{2+}$  release-activated channels (CRACs) [11].

79 Disease-causing mutations, such as loss-of-function mutations in PDE6, lead to

80 cGMP accumulation and exacerbated activation of CNGCs, which may result in an  
81 abnormally strong influx of  $\text{Ca}^{2+}$  into photoreceptors [12, 13]. The increased CNGC  
82 activity may keep the photoreceptors in a permanently depolarized state that triggers a  
83 sustained activation of VGCCs and further  $\text{Ca}^{2+}$  influx [14]. Excessive  $\text{Ca}^{2+}$  in RP animal  
84 models, such as in the *Pde6b* mutant *rd1* and *rd10* mice [15], is thought to lead to high  
85 activity of  $\text{Ca}^{2+}$ -dependent calpain-type proteases and may precede cell death [16, 17].

86 To elucidate what the roles of CNGC and VGCC are in photoreceptor cell death, the  
87 *rd1* mouse was previously crossbred with knockouts (KO) that impaired the function of  
88 either CNGC (*Cngb1*<sup>-/-</sup>) or VGCC (*Cacna1f*<sup>-/-</sup>). In the *rd1* \* *Cngb1*<sup>-/-</sup> double mutant mouse,  
89 an animal in which both PDE6 and CNGC were dysfunctional, calpain activity was  
90 strongly reduced, and photoreceptor degeneration was considerably delayed, when  
91 compared to the single-mutant *rd1* situation [12]. Similar results were obtained when *rd10*  
92 mice were crossed with *Cngb1*<sup>-/-</sup> animals [18]. In contrast, in *rd1* \* *Cacna1f*<sup>-/-</sup> double-  
93 mutants, the dysfunction of the synaptic VGCCs had essentially no effect on the *rd1*  
94 degeneration [19]. However, *rd1* \* *Cacna1f*<sup>-/-</sup> double-mutants did display a marked  
95 reduction of photoreceptor calpain activity, like their *rd1* \* *Cngb1*<sup>-/-</sup> counterparts. Taken  
96 together, these studies suggest CNGC activity as a possible driver of *rd1* photoreceptor  
97 degeneration and as a potential target for pharmacological inhibition.

98 Many studies over the past two decades have assessed the protective potential of  
99  $\text{Ca}^{2+}$ -channel blockers in photoreceptor degeneration (reviewed in [20]). Here, diltiazem  
100 stands out as particularly interesting, because its D-cis enantiomer blocks VGCCs, while  
101 the L-cis enantiomer acts more strongly on CNGCs [21, 22]. Both D- and L-cis-diltiazem  
102 have been suggested to delay *rd1* photoreceptor degeneration [25, 26, 16]. However,  
103 several other studies reported conflicting or contradictory results [25, 26, 27, 28]. The  
104 reasons for this diversity in results are still unclear. Moreover, while the effect of diltiazem  
105 on VGCCs was already the topic of several studies [21-24], the direct action of diltiazem  
106 on photoreceptor CNGCs was not yet systematically characterized.

107 Here, we assessed the effect of D- and L-cis-diltiazem on rod and cone CNGCs  
108 heterologously expressed in *Xenopus* oocytes under physiological and RP/ACHM-like  
109 conditions. Our results suggest that only L-cis-diltiazem efficiently reduces the activity of  
110 CNGC under pathologically high cGMP-conditions, most probably by obstructing its  
111 conductive pore. This inhibitory effect of L-cis-diltiazem was voltage- and cGMP-  
112 dependent and much stronger on rod than on cone CNGCs. Surprisingly, in organotypic  
113 retinal explant cultures, derived from *rd1* mice, treatment with neither D- nor L-cis-

114 diltiazem prevented photoreceptor degeneration. Quite the contrary, CNGC inhibition  
115 with L-cis-diltiazem in fact exacerbated *rd1* photoreceptor loss. In summary, our results  
116 indicate that CNGC or VGCC inhibition can effectively reduce photoreceptor Ca<sup>2+</sup> levels,  
117 however, this will not decrease, but may rather increase, photoreceptor cell death. This  
118 suggests that photoreceptor degeneration is largely independent of CNGC or VGCC  
119 activity.

120

121 **II. RESULTS**

122 **Differential effects of D- and L-cis-diltiazem on photoreceptor CNGC**

123 For a direct assessment of the effects of D- and L-cis-diltiazem on retinal CNGCs, we  
124 expressed the heterotetrameric rod CNGA1:B1a- and cone CNGA3:B3-channels in  
125 *Xenopus laevis* oocytes and examined their functional characteristics in inside-out  
126 membrane patches, using electrophysiological recordings. We started by confirming the  
127 correct assembly of heterotetrameric CNGC in the oocyte plasma membrane via two  
128 different tests: (1) Co-expression of the main subunits, rod CNGA1 and cone CNGA3,  
129 together with the modulatory subunits, CNGB1a and CNGB3, respectively, led to a  
130 strong increase of cAMP efficacy in heterotetrameric vs. homotetrameric channels, as  
131 previously reported [25, 26] (see METHODS and Supplementary Fig. 1a,b). (2)  
132 Expression of heterotetrameric CNGCs with GFP-labelled CNGB1a or CNGB3 subunits  
133 and staining the oocyte plasma membrane from the extracellular side with fluorescently-  
134 labelled lectin (Alexa Fluor™ 633 - WGA) led to spatial overlap between the GFP- and  
135 the WGA-fluorescence profiles (see METHODS and Supplementary Fig. 1c, d).

136 To characterize retinal CNGCs, we first measured the steady-state concentration-  
137 activation relationships in the presence of cGMP at -35 mV (Table 1; Supplementary Fig.  
138 1e, f). The effect of diltiazem on CNGCs was tested by measuring and comparing the  
139 cGMP-induced currents in the presence and absence of either 25 or 100  $\mu$ M, D- and L-  
140 cis-diltiazem, respectively (Fig. 1).

141 Under physiological conditions, at -35 mV and with up to 5  $\mu$ M cGMP [27, 28], CNGC  
142 activity reached ~6 % of its maximum for the cone and ~1 % for the rod isoforms (yellow  
143 areas in Fig. 1a-d). When applied to the intracellular side of the membrane patch, neither  
144 D- nor L-cis-diltiazem (up to 100  $\mu$ M) significantly influenced physiological CNGCs  
145 activity (Fig. 1, for statistics see Table 2). To test this finding in cone CNGC, in which  
146 under early RP-conditions a healthy cGMP homeostasis is expected, we additionally  
147 recorded and compared, within the same measurement, the CNGC currents in the  
148 presence of either cGMP or cGMP and 25  $\mu$ M intracellular L-cis-diltiazem  
149 (Supplementary Fig. 2). Under these conditions, we observed no significant difference  
150 between the channel activity with and without L-cis-diltiazem.

151 In the presence of saturating cGMP (3 mM), both diltiazem enantiomers showed a  
152 clear inhibitory effect on cone and rod CNGCs (grey areas in Fig. 1a-d). The strongest  
153 inhibitory effect on both CNGC isoforms was triggered by L-cis-diltiazem. The rod CNGC

154 isoform was the most sensitive to both D- and L-cis-diltiazem (Fig. 1e). Specifically, 100  
155  $\mu\text{M}$  L-cis-diltiazem blocked  $\sim 92\%$  of the rod CNGC activity, whereas D-cis-diltiazem at  
156 the same concentration blocked only  $\sim 36\%$  (Table 2). In comparison, the activity of cone  
157 CNGCs was reduced by  $\sim 43\%$  with 100  $\mu\text{M}$  L-cis-diltiazem and only by  $\sim 11\%$  with 100  
158  $\mu\text{M}$  D-cis-diltiazem. 100  $\mu\text{M}$  D- and L-cis-diltiazem triggered slightly stronger inhibitory  
159 effects than those induced by 25  $\mu\text{M}$ . At 100  $\mu\text{M}$  cGMP, a pathologically high cGMP  
160 concentration, which emulates RP-like conditions, the diltiazem effect on rod CNGCs,  
161 mirrored very closely our observations in the presence of 3 mM cGMP (Fig. 1f).

162 We next measured the inhibitory effect of diltiazem on CNGCs at different voltages  
163 ( $-100$  and  $+100$  mV). Both diltiazem enantiomers showed a stronger inhibitory effect at  
164 depolarizing than at hyperpolarizing membrane voltages (Supplementary Figs. 3-5;  
165 Table 2). With 100  $\mu\text{M}$  D-cis-diltiazem and saturating cGMP (3 mM cGMP), we observed  
166 an increase by a factor of  $\sim 4$  in the strength of the cone CNGC block at  $+100$  mV, in  
167 comparison with that at  $-100$  mV. Under the same conditions, the inhibitory effect on rod  
168 CNGCs was increased by a factor of  $\sim 7$ . In comparison, the voltage dependence of the  
169 L-cis-diltiazem-induced effect was much weaker:  $\sim 2.6$  times stronger block at  $+100$  mV  
170 than that at  $-100$  mV for cone CNGC, and only  $\sim 1.4$  times for rod CNGC. In the presence  
171 of 25  $\mu\text{M}$  D- or L-cis-diltiazem, we observed a similar voltage dependence of the inhibitory  
172 effects as with 100  $\mu\text{M}$  (Supplementary Fig. 5).

173 To assess the effect of diltiazem on the channel's apparent affinity, we compared the  
174  $EC_{50}$ -values and the Hill coefficients ( $H$ ) obtained from the fits of the respective  
175 concentration-activation relationships. Under all experimental conditions, we observed a  
176 voltage-dependent decrease in the channel's apparent affinity with a maximum at  $+100$   
177 mV (Table 1, Supplementary Fig. 5c, d; for statistical analysis see Supplementary Table  
178 1). In addition, diltiazem, mostly at 100  $\mu\text{M}$ , triggered a systematic decrease of the  $H$ -  
179 values at both  $-100$  and  $+100$  mV. The similarity between the effects of D and L-cis-  
180 diltiazem on  $EC_{50}$ - and  $H$ -values, may suggest that both diltiazem enantiomers influence  
181 the apparent affinity of the CNGCs and the cooperativity between their subunits through  
182 a similar mechanism.



183 In conclusion, our data so far showed that (1) under physiological conditions, neither  
 184 D- nor L-cis-diltiazem affect the activity of CNGCs, at the tested concentrations; (2) at  
 185 saturating cGMP concentration, D- and L-cis-diltiazem had a differential inhibitory effect,  
 186 with a stronger inhibition of rod- vs. cone-CNGCs and the effect of L- exceeding that of  
 187 D-cis-diltiazem; (3) the D- and L-cis-diltiazem effects on CNGCs were strongly voltage  
 188 dependent, with a maximum at depolarizing voltages.

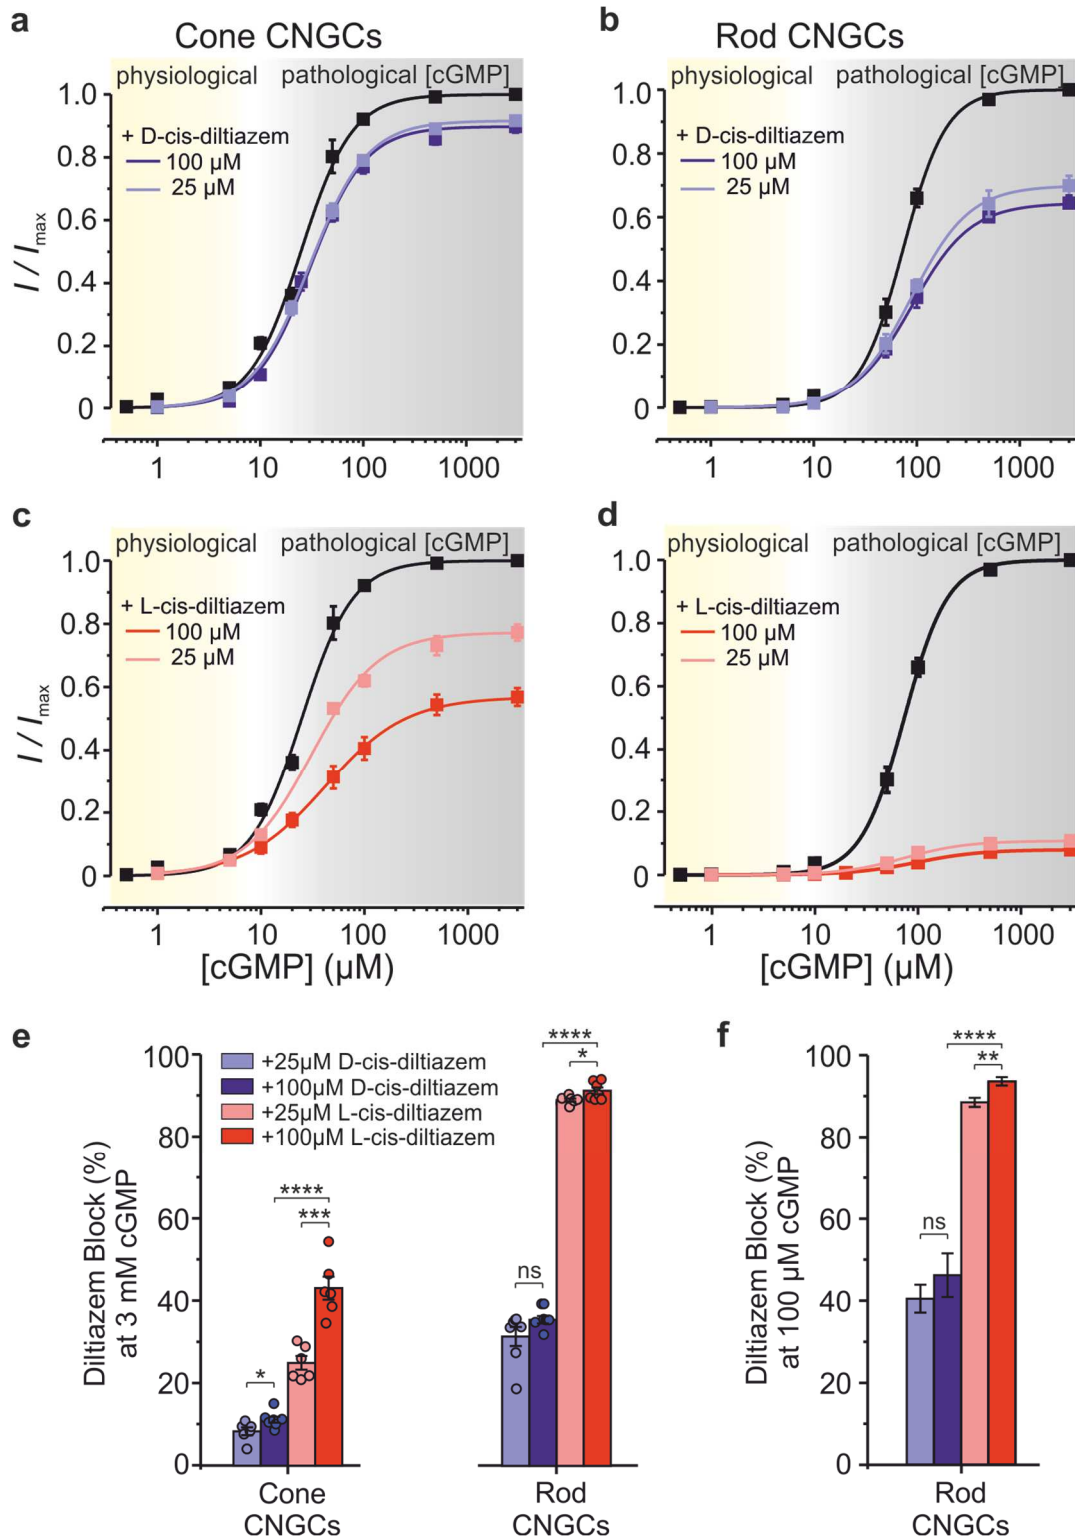



190 **Fig. 1: Effects of D- and L-cis-diltiazem on the activity of rod and cone CNGCs. (a-**  
 191 **d)** Concentration-activation relationships for heterotetrameric cone (**a, c**) and rod (**b, d**)  
 192 CNGCs in the presence of either 100  $\mu\text{M}$  or 25  $\mu\text{M}$  D- or L-cis-diltiazem, respectively,  
 193 measured at -35 mV. The respective curves represent fits of the experimental data points  
 194 with the Hill equation (Eq. 1). Black symbols show the normalized cGMP-triggered  
 195 current amplitudes in the absence of diltiazem and are shown to point out the effect of  
 196 the blocker. Light- and dark-blue symbols represent data obtained in the presence of D-  
 197 cis-diltiazem, at 25 and 100  $\mu\text{M}$ , respectively (**a, b**). Light- and dark-red symbols  
 198 represent data obtained in the presence of L-cis-diltiazem at 25 and 100  $\mu\text{M}$ , respectively  
 199 (**c, d**). (**e, f**) D- and L-cis-diltiazem - block (% ,  $\pm\text{SEM}$ ) of CNGCs in the presence of 3 mM  
 200 (**e**) and 100  $\mu\text{M}$  cGMP (**f**), respectively. The amount of diltiazem block was calculated  
 201 using Eq. 2 (see METHODS). The respective symbols represent single measurements  
 202 (see also Table 1 and 2).

203

| mV       | cone CNGC              |                    |    |                                    |                    |   |                                    |                    |   |                                   |                    |    |                                    |                    |   |
|----------|------------------------|--------------------|----|------------------------------------|--------------------|---|------------------------------------|--------------------|---|-----------------------------------|--------------------|----|------------------------------------|--------------------|---|
|          | cGMP ( $\mu\text{M}$ ) |                    |    | + 25 $\mu\text{M}$ D-cis-diltiazem |                    |   | +100 $\mu\text{M}$ D-cis-diltiazem |                    |   | +25 $\mu\text{M}$ L-cis-diltiazem |                    |    | +100 $\mu\text{M}$ L-cis-diltiazem |                    |   |
|          | $EC_{50}$              | $H$                | n  | $EC_{50}$                          | $H$                | n | $EC_{50}$                          | $H$                | n | $EC_{50}$                         | $H$                | n  | $EC_{50}$                          | $H$                | n |
| -35      | 26.0<br>$\pm 2.9$      | 1.81<br>$\pm 0.1$  | 7  | 31.7<br>$\pm 1.6$                  | 1.71<br>$\pm 0.1$  | 6 | 28.8<br>$\pm 1.4$                  | 1.54<br>$\pm 0.1$  | 7 | 31.1<br>$\pm 1.1$                 | 1.36<br>$\pm 0.09$ | 5  | 42.6<br>$\pm 4.0$                  | 1.28<br>$\pm 0.1$  | 6 |
| -100     | 20.7<br>$\pm 2.1$      | 2.12<br>$\pm 0.1$  | 9  | 28.0<br>$\pm 0.6$                  | 1.93<br>$\pm 0.08$ | 8 | 32.5<br>$\pm 3.0$                  | 1.56<br>$\pm 0.1$  | 5 | 28.0<br>$\pm 1.2$                 | 1.65<br>$\pm 0.07$ | 10 | 47.8<br>$\pm 6.6$                  | 1.13<br>$\pm 0.09$ | 5 |
| +100     | 13.5<br>$\pm 3.2$      | 1.70<br>$\pm 0.1$  | 5  | 27.5<br>$\pm 1.7$                  | 1.43<br>$\pm 0.1$  | 7 | 49.9<br>$\pm 6.0$                  | 1.20<br>$\pm 0.05$ | 5 | 40.6<br>$\pm 4.9$                 | 1.13<br>$\pm 0.1$  | 9  | 56.1<br>$\pm 9.9$                  | 0.95<br>$\pm 0.1$  | 5 |
| rod CNGC |                        |                    |    |                                    |                    |   |                                    |                    |   |                                   |                    |    |                                    |                    |   |
| -35      | 70.1<br>$\pm 5.3$      | 1.74<br>$\pm 0.1$  | 7  | 85.7<br>$\pm 8.8$                  | 1.71<br>$\pm 0.1$  | 7 | 95.4<br>$\pm 9.2$                  | 1.68<br>$\pm 0.1$  | 6 | 79.2<br>$\pm 8.1$                 | 1.49<br>$\pm 0.2$  | 5  | 103.2<br>$\pm 12.4$                | 1.28<br>$\pm 0.1$  | 6 |
| -100     | 61.5<br>$\pm 5.3$      | 1.98<br>$\pm 0.1$  | 10 | 86.3<br>$\pm 6.4$                  | 1.93<br>$\pm 0.08$ | 5 | 77.2<br>$\pm 5.5$                  | 1.84<br>$\pm 0.08$ | 7 | 84.3<br>$\pm 8.8$                 | 1.27<br>$\pm 0.1$  | 5  | 92.4<br>$\pm 15.2$                 | 1.20<br>$\pm 0.1$  | 6 |
| +100     | 46.5<br>$\pm 6.5$      | 2.02<br>$\pm 0.07$ | 10 | 109.5<br>$\pm 10.0$                | 1.43<br>$\pm 0.1$  | 6 | 102.8<br>$\pm 7.9$                 | 1.19<br>$\pm 0.2$  | 6 | 134.5<br>$\pm 14.8$               | 1.18<br>$\pm 0.06$ | 5  | 129.3<br>$\pm 13.3$                | 1.15<br>$\pm 0.1$  | 6 |

204

205 **Table 1: Effect of D- and L-cis-diltiazem on the apparent affinity of rod and cone**  
 206 **CNGC.** The  $EC_{50}$ -values and Hill coefficients ( $H$ ,  $\pm\text{SEM}$ ) were obtained from the  
 207 concentrations-activation relationships presented in Fig. 1 and Supplementary Figs. 3,4,  
 208 for rod and cone CNGCs (n = number of experiments). Two-tailed unpaired Student  $t$ -  
 209 test was used to compare the  $EC_{50}$ - and  $H$ -values in the presence of diltiazem with the  
 210 ones obtained in its absence (Supplementary Table 1).

211

212

213

| mV   | Diltiazem Block (%) of cone CNGC at 3 mM cGMP       |                                  |                 |                                 |                                  |                 |
|------|-----------------------------------------------------|----------------------------------|-----------------|---------------------------------|----------------------------------|-----------------|
|      | + 25 $\mu$ M<br>D-cis-diltiazem                     | + 100 $\mu$ M<br>D-cis-diltiazem | <i>p</i> -value | + 25 $\mu$ M<br>L-cis-diltiazem | + 100 $\mu$ M<br>L-cis-diltiazem | <i>p</i> -value |
| -35  | 8.37 $\pm$ 0.97                                     | 11.2 $\pm$ 1.1                   | 0.0378          | 25.0 $\pm$ 1.6                  | 43.2 $\pm$ 2.8                   | 0.0002          |
| -100 | 1.20 $\pm$ 0.3                                      | 8.02 $\pm$ 1.7                   | 0.0001          | 4.9 $\pm$ 0.8                   | 25.3 $\pm$ 3.4                   | <0.0001         |
| +100 | 13.5 $\pm$ 1.6                                      | 34.0 $\pm$ 1.1                   | <0.0001         | 39.2 $\pm$ 2.2                  | 67.2 $\pm$ 1.4                   | <0.0001         |
| mV   | Diltiazem Block (%) of rod CNGC at 3 mM cGMP        |                                  |                 |                                 |                                  |                 |
|      | + 25 $\mu$ M<br>D-cis-diltiazem                     | + 100 $\mu$ M<br>D-cis-diltiazem | <i>p</i> -value | + 25 $\mu$ M<br>L-cis-diltiazem | + 100 $\mu$ M<br>L-cis-diltiazem | <i>p</i> -value |
| -35  | 31.5 $\pm$ 2.3                                      | 35.6 $\pm$ 0.9                   | ns              | 89.2 $\pm$ 0.37                 | 91.5 $\pm$ 0.8                   | 0.0270          |
| -100 | 3.26 $\pm$ 1.7                                      | 11.9 $\pm$ 0.9                   | 0.0006          | 52.4 $\pm$ 2.7                  | 66.2 $\pm$ 2.0                   | 0.0025          |
| +100 | 53.5 $\pm$ 1.6                                      | 83.1 $\pm$ 1.2                   | <0.0001         | 90.0 $\pm$ 0.65                 | 93.5 $\pm$ 1.4                   | 0.0004          |
| mV   | Diltiazem Block (%) of rod CNGC at 100 $\mu$ M cGMP |                                  |                 |                                 |                                  |                 |
|      | + 25 $\mu$ M<br>D-cis-diltiazem                     | + 100 $\mu$ M<br>D-cis-diltiazem | <i>p</i> -value | + 25 $\mu$ M<br>L-cis-diltiazem | + 100 $\mu$ M<br>L-cis-diltiazem | <i>p</i> -value |
| -35  | 40.4 $\pm$ 3.4                                      | 46.1 $\pm$ 5.3                   | ns              | 88.4 $\pm$ 1.1                  | 93.5 $\pm$ 1.1                   | 0.0021          |

214

215 **Table 2: Effect of D- and L-cis-diltiazem on the current amplitude of rod and cone**  
 216 **CNGCs.** The amount of block was determined by comparing the CNGC currents in the  
 217 presence and in the absence of either D- or L-cis-diltiazem ( $\pm$ SEM, n=5-10) and was  
 218 calculated using Eq. 2. The comparison between 25 and 100  $\mu$ m of D- and L-cis-  
 219 diltiazem, respectively, was performed using the two-tailed unpaired Student's *t*-test.

220

### 221 Effects of D- and L-cis-diltiazem on CNGC activation and deactivation kinetics

222 To characterize the effect of D- and L-cis-diltiazem on the channel's gating kinetics,  
 223 we studied the activation and deactivation time courses for cone and rod CNGCs, with  
 224 and without diltiazem (Fig. 2a, b; METHODS). When applying both cGMP and diltiazem  
 225 simultaneously, the blocking effect took place only after channel activation. This implies  
 226 that either diltiazem can block open channels only or that the blocking mechanism is  
 227 slower or starts with a certain delay, reaching a maximum only after channel activation.  
 228 When cGMP and diltiazem were simultaneously removed, we observed a delay of the  
 229 channel's deactivation, suggesting that the channels cannot close until diltiazem is at  
 230 least partially removed, as it would be the case if diltiazem blocks the channel pore. The  
 231 small current increase observed during washout onset mirrors the initial phase of the  
 232 diltiazem removal. The activation of CNGC ( $\tau_{act}$ ) seemed unaffected whereas the  
 233 channel's deactivation ( $\tau_{deact}$ ) was delayed and slowed down by a factor of  $\sim$ 2 for both  
 234 CNGC isoforms (Table 3). Moreover, the kinetics of the blocking event was similar for  
 235 both channel isoforms ( $\tau_{block}$ ) (Fig. 2c, for detailed statistics see Table 3). In conclusion,  
 236 only the deactivation of rod and cone CNGC was influenced by diltiazem and the effects  
 237 triggered by the two diltiazem enantiomers were comparable. These findings suggest a  
 238 common blocking mechanism for D- and L-cis-diltiazem, possibly by obstructing the  
 239 channel pore.

240 Based on this hypothesis, we tested whether the observed diltiazem-induced block is  
 241 obstructed by  $\text{Ca}^{2+}$ , as one of the permeating ions through CNGCs [29, 30]. To this end,  
 242 we studied the effect of 25  $\mu\text{M}$  L-cis-diltiazem on rod CNGCs in the presence of 1 mM  
 243  $\text{CaCl}_2$  on the extracellular side of the membrane. As expected, in the presence of  $\text{Ca}^{2+}$   
 244 we found a reduced cGMP-triggered activation of CNGCs (Supplementary Fig. 6a), an  
 245 effect that is consistent with a very slow  $\text{Ca}^{2+}$  permeation through the channel pore [31].  
 246 Nevertheless, the influence of extracellular  $\text{Ca}^{2+}$  on the strength of the L-cis-diltiazem-  
 247 induced block was negligible (Supplementary Fig. 6b), arguing against the possibility that  
 248  $\text{Ca}^{2+}$  substantially obstructs diltiazem binding to its binding pocket. A similar result was  
 249 reported earlier when studying the effect of diltiazem on the  $\text{Ba}^{2+}$ -current carried by  
 250 VGCCs [21].  
 251

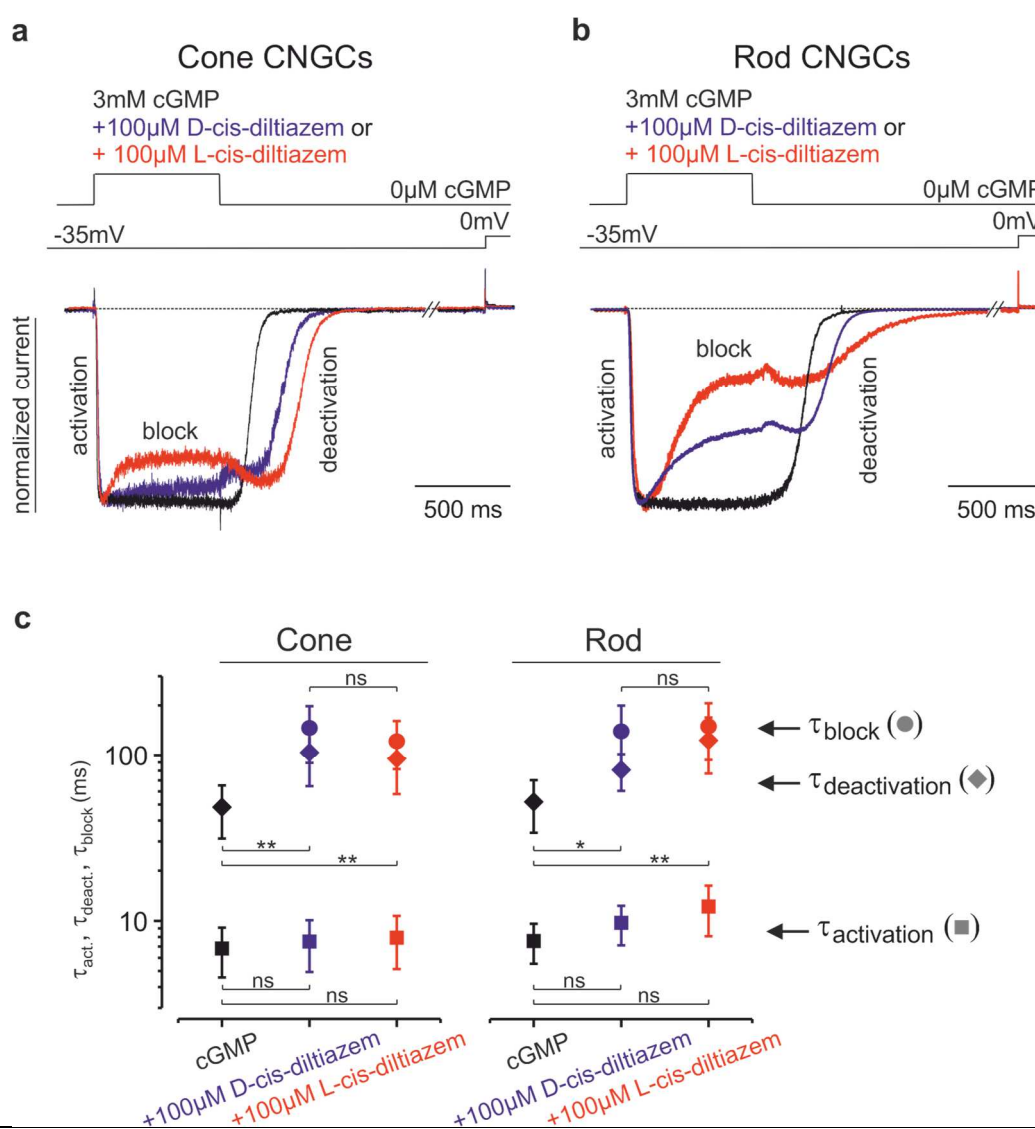

252 **Fig. 2: D- and L-cis-diltiazem influence the gating kinetics of rod and cone CNGCs.**  
 253 Superimposition of representative activation-, deactivation- and block- time courses  
 254 following a concentration jump from 0  $\mu\text{M}$  cGMP to either 3 mM cGMP or 3 mM cGMP +

255 100  $\mu\text{M}$  D- or L-cis-diltiazem and back to 0  $\mu\text{M}$  cGMP for cone **(a)** and rod **(b)** CNGCs  
 256 (n=5-9). Panels **(a)** and **(b)** show representative current traces. The current traces (blue  
 257 for D-, red for L-cis-diltiazem) were normalized to the initial current level triggered by 3  
 258 mM cGMP (black) in the absence of diltiazem. Above the current traces are depicted the  
 259 experimental protocols. **c)** CNGC-activation, -deactivation and -block time constants  
 260 ( $\tau_{\text{act}}$ ,  $\tau_{\text{deact}}$ ,  $\tau_{\text{block}}$ ). The respective traces in **(a)** and **(b)** were fitted with mono-exponential  
 261 functions (Eq. 3) and the obtained mean time constants and statistical analysis (ms,  
 262  $\pm\text{SEM}$ ) were included in Table 3. The time course of channel deactivation was fitted  
 263 starting after the initial delay due to diltiazem removal.

|                                        | cone CNGC                |         |                            |         |                            |         |
|----------------------------------------|--------------------------|---------|----------------------------|---------|----------------------------|---------|
|                                        | $\tau_{\text{act}}$ (ms) | p-value | $\tau_{\text{deact}}$ (ms) | p-value | $\tau_{\text{block}}$ (ms) | p-value |
| cGMP ( $\mu\text{M}$ )                 | 6.8 $\pm$ 2.3            | -       | 48.2 $\pm$ 17.0            | -       |                            | -       |
| + 100 $\mu\text{M}$<br>D-cis-diltiazem | 7.5 $\pm$ 2.6            | ns      | 103.6 $\pm$ 39.1           | 0.0009  | 154.4 $\pm$ 53.4           | ns      |
| + 100 $\mu\text{M}$<br>L-cis-diltiazem | 7.9 $\pm$ 2.8            | ns      | 94.7 $\pm$ 36.8            | 0.0032  | 120.4 $\pm$ 38.5           |         |
| rod CNGC                               |                          |         |                            |         |                            |         |
| cGMP ( $\mu\text{M}$ )                 | 7.6 $\pm$ 2.1            | -       | 52.1 $\pm$ 18.2            | -       |                            | -       |
| + 100 $\mu\text{M}$<br>D-cis-diltiazem | 9.8 $\pm$ 2.6            | ns      | 81.2 $\pm$ 30.5            | 0.0315  | 139.7 $\pm$ 60.2           | ns      |
| + 100 $\mu\text{M}$<br>L-cis-diltiazem | 12.2 $\pm$ 4.1           | ns      | 123.4 $\pm$ 46.1           | 0.0010  | 150.0 $\pm$ 56.7           |         |

275 **Table 3: Effect of D- and L-cis-diltiazem on the gating kinetics of cone and rod**  
 276 **CNGCs.** The effect of diltiazem on the cone and rod activation- and deactivation- time  
 277 constants ( $\tau_{\text{act}}$ ,  $\tau_{\text{deact}}$  and  $\tau_{\text{block}}$ ) in the presence of 3 mM cGMP (ms,  $\pm\text{SEM}$ , n=5-9). Two-  
 278 tailed unpaired Student *t*-test was used for the comparison between time constants  
 279 obtained in the presence and in the absence of diltiazem.

### 281 Effect of L-cis-diltiazem on cGMP binding

282 To assess whether diltiazem influences ligand binding, we measured cGMP binding  
 283 and CNGC activation, simultaneously, under steady-state conditions, with and without  
 284 diltiazem, by means of confocal patch-clamp fluorometry (cPCF) [32-34]. For these  
 285 experiments, we used (a) rod CNGC, the most diltiazem-sensitive channel, (b) L-cis-  
 286 diltiazem, the enantiomer with the strongest blocking effect and (c) f\*cGMP (8-[DY-547]-  
 287 AHT-cGMP), a fluorescent derivative of cGMP (Fig. 3). In a previous study, we showed  
 288 that f\*cAMP, the correspondent fluorescent derivative of cAMP, has  $\sim 8\times$  higher potency  
 289 to open the olfactory CNGCs [35]. Similarly, 10  $\mu\text{M}$  f\*cGMP triggered already  $87.4 \pm 1.4\%$   
 290 activation of rod CNGC, which is  $\sim 20$  times more than the activation triggered by 10  $\mu\text{M}$   
 291 cGMP (Fig. 3, see also Fig. 1b).

292 As expected, the 10  $\mu\text{M}$  f\*cGMP-induced current was reduced in the presence of L-  
 293 cis-diltiazem to  $10.8 \pm 1.1\%$ . The current recovery triggered by the blocker removal  
 294 showed two phases, a fast recovery in which  $38.9 \pm 3.2\%$  of the 10  $\mu\text{M}$  f\*cGMP-induced  
 295 current was reached and a very slow phase which took several minutes (Fig. 3). To  
 296 overrule possible side effects coming from f\*cGMP, we used cGMP in similar control

297 measurements and obtained a similar biphasic CNGCs recovery (Supplementary Fig. 7).  
298 Moreover, we noticed a faster washout of the diltiazem-induced effect when the blocker  
299 and cGMP were concomitantly removed (Fig. 2a, b), compared to when diltiazem alone  
300 was removed from an open channel (Fig. 3). This can only be explained by an  
301 acceleration of the diltiazem unbinding triggered by the simultaneous channel closure.

302 During the application of L-cis-diltiazem and after its removal from the f\*cGMP-  
303 activated CNGCs, we observed no major change in the intensity of the fluorescence  
304 signal which encodes for the total amount of bound f\*cGMP. This showed that L-cis-  
305 diltiazem inhibits the CNGCs without disturbing the cGMP binding to the channels. These  
306 results support our electrophysiological data at -35 mV, where diltiazem showed only a  
307 minor effect on the apparent affinity of the channels (Supplementary Fig. 5c, d).

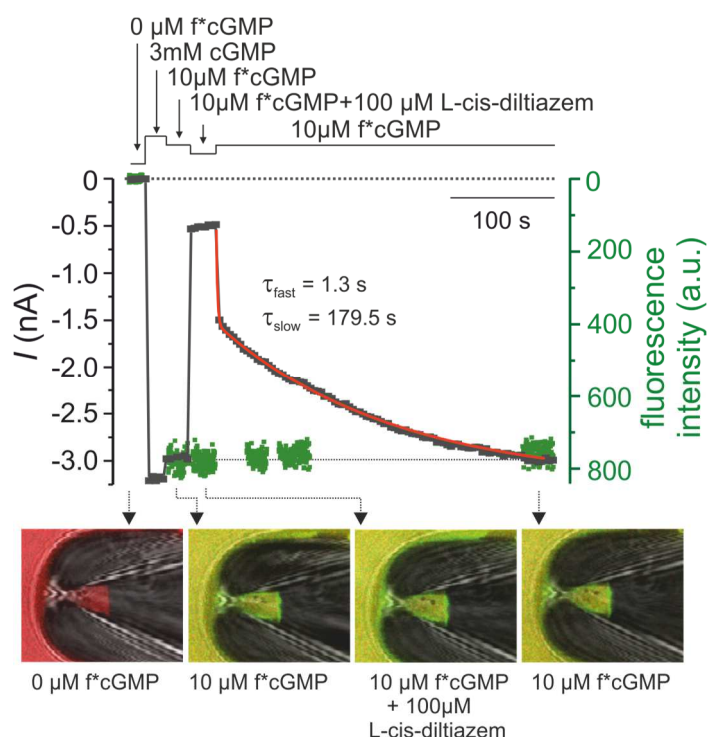

308  
309 **Fig. 3: L-cis-diltiazem does not influence cGMP binding to rod CNGCs.** Shown is a  
310 representative cPCF measurement for studying simultaneously f\*cGMP (8-[DY-547]-  
311 AHT-cGMP) binding and rod CNGCs activation in the presence of 100 μM L-cis-  
312 diltiazem. The experimental protocol is depicted above the diagram. Black symbols  
313 represent the current amplitude measured under steady-state conditions. Green symbols  
314 represent the fluorescence signal of f\*cGMP which indicates the amount of ligand  
315 binding. The binding signal, measured under steady-state conditions, was normalized to  
316 the level of the 10 μM f\*cGMP-induced current. In the lower part of the diagram are shown  
317 confocal images of glass pipettes, containing CNGCs-expressing membrane patches,  
318 which were obtained during the measurement in the absence (first image, left), in the  
319 presence of 10 μM f\*cGMP (second and fourth image) and in the presence of 10 μM  
320 f\*cGMP + 100 μM L-cis-diltiazem (third image). The time course of the current recovery  
321 upon removal of L-cis-diltiazem was fitted with a double exponential function yielding  $\tau_{fast}$   
322 =  $1.5 \pm 0.1 \text{ s}$  and  $\tau_{slow} = 161.9 \pm 24.5 \text{ s}$  (red line, n=8, Eq. 4).



323

324 **Effects of D- and L-cis-diltiazem on light induced photoreceptor  $\text{Ca}^{2+}$  responses**

325 Using two-photon  $\text{Ca}^{2+}$  imaging, we recorded light-induced cone responses in retinal  
326 slices from adult transgenic mice that had a wild-type (wt) background and expressed a  
327 fluorescent  $\text{Ca}^{2+}$  biosensor exclusively in cones [16]. As the biosensor was absent from  
328 the OS, we recorded in the cone terminal (Fig. 4a), using synaptic  $\text{Ca}^{2+}$  signals as a  
329 proxy for changes in membrane potential caused by the light-dependent modulation of  
330 CNGCs in the OS [17]. We presented series of 1-s flashes of light and measured the  
331 change (decrease) in terminal  $\text{Ca}^{2+}$ , quantifying the responses using area-under-the-  
332 curve (AUC), without (control) and in the presence of both diltiazem enantiomers at  
333 different concentrations (25, 50, and 100  $\mu\text{M}$ ).

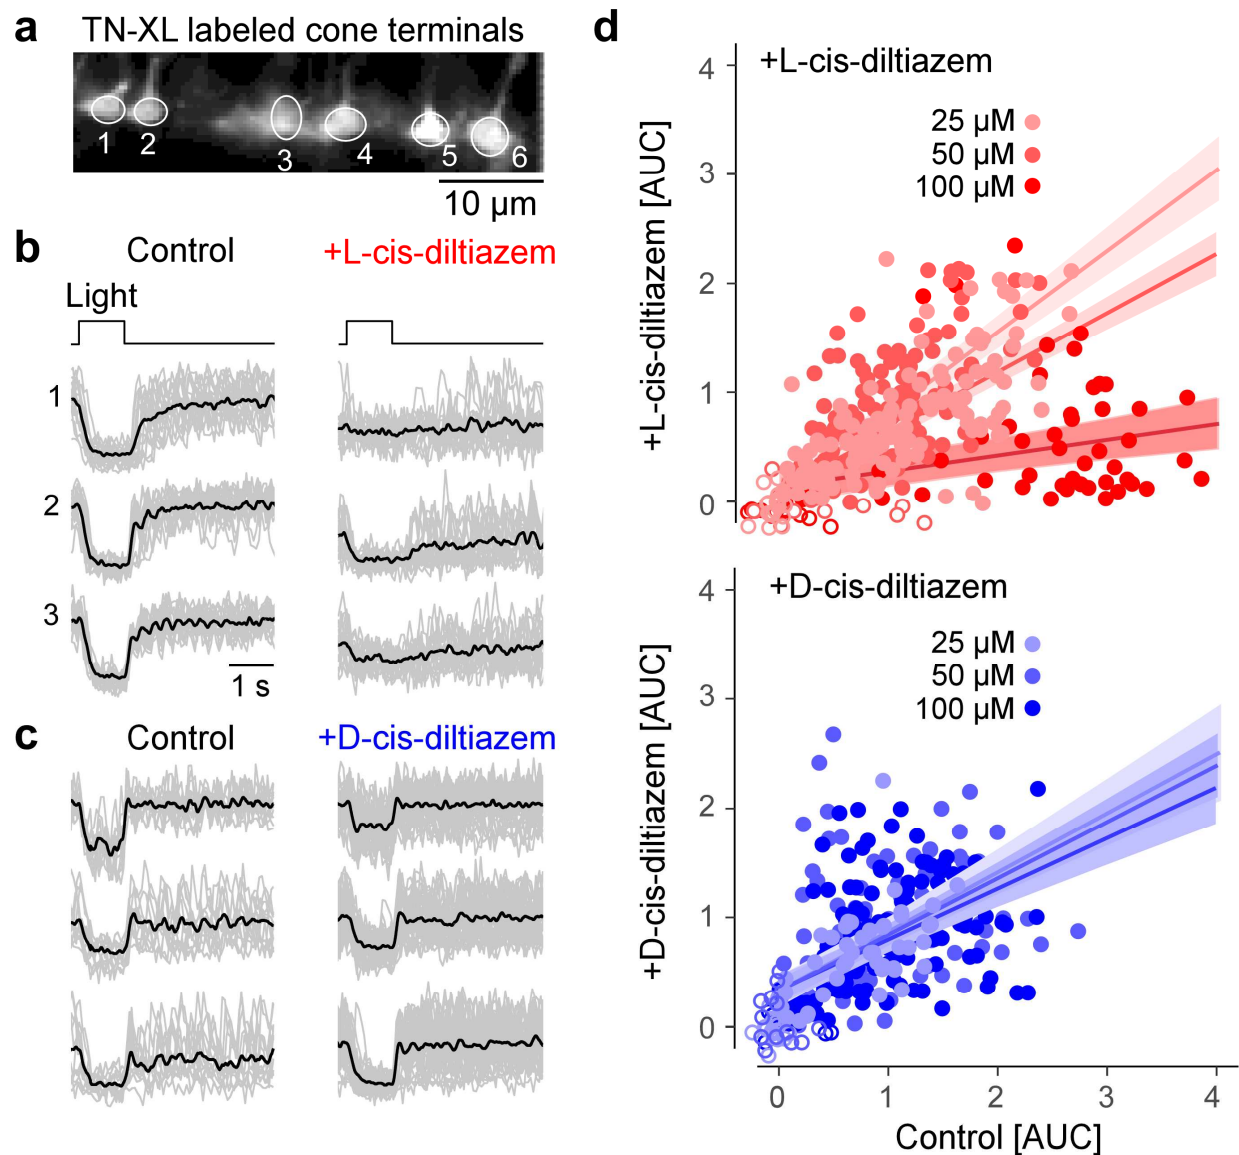

334

335 **Fig. 4: Light-evoked cone  $\text{Ca}^{2+}$ -responses are reduced by L- but not by D-cis-**  
336 **diltiazem.** (a) Recording light-evoked  $\text{Ca}^{2+}$ -responses from cone photoreceptor

337 terminals in retinal slices prepared from a transgenic mouse that expresses the  
338 fluorescent  $\text{Ca}^{2+}$  sensor TN-XL in cones. **(b, c)** Exemplary  $\text{Ca}^{2+}$  responses before  
339 (control) and in the presence of 100  $\mu\text{M}$  L- **(b)** or D-cis- diltiazem **(c)** (z-scored traces;  
340 grey, single trials; black, mean of n trials, with control in (b), n=13; control in (c), n=19; L-  
341 cis-diltiazem, n=19; D-cis-diltiazem, n=38). **(d)** Scatter plot of response size (as area-  
342 under-the-curve, AUC) for both L-cis (blue; 25/50/100  $\mu\text{M}$  n=137/138/61 cells) and L-cis-  
343 diltiazem (red; 25/50/100  $\mu\text{M}$  n=62/140/162 cells; each data point represents a cell). Fits  
344 show mean predictions and standard errors from a multivariate linear model (METHODS  
345 and Table 4).

346 We used a multivariate linear model to identify which factors (*i.e.* enantiomer,  
347 concentration) are significant for predicting the response of a cell after drug treatment  
348 (for details see METHODS and Table 4). This analysis showed that L-cis-diltiazem  
349 significantly decreased the responses in a concentration-dependent manner, whereas  
350 D-cis-diltiazem did not affect the light-induced cone  $\text{Ca}^{2+}$  responses at any concentration  
351 (Fig. 4b, c, d; for detailed statistics, see Table 4). Note that L-cis-diltiazem (but not D-cis-  
352 diltiazem) also tended to decrease the  $\text{Ca}^{2+}$ -baseline level (Fig. 4b, c; left vs. right).

| Component                                            | p-value | Effect-Size | ES-Lower-CI | ES-Upper-CI |
|------------------------------------------------------|---------|-------------|-------------|-------------|
| Model (all components)                               |         | 0.368       | 0.319       | 0.422       |
| AUC (control)                                        | <0.0001 | 0.195       | 0.147       | 0.247       |
| Treatment (drug)                                     | 0.00123 | 0.05        | 0.023       | 0.085       |
| Treatment (concentration)                            | 0.3416  | 0.039       | 0.016       | 0.072       |
| AUC (control) x treatment (drug)                     | 0.119   | 0.003       | 0           | 0.017       |
| AUC (control) x treatment (conc.)                    | 0.171   | 0.002       | 0           | 0.015       |
| AUC (control) x treatment (drug) x treatment (conc.) | <0.0001 | 0.021       | 0.005       | 0.047       |

353  
354 **Table 4: Effect of D- and L-cis-diltiazem on light-evoked  $\text{Ca}^{2+}$  signals in wt cone**  
355 **photoreceptors.** The linear modelling identified the variables that significantly predict  
356 the data. The area-under-the-curve (AUC) in the control condition was significant and  
357 had the largest effect size, with semi-partial R-squared (SPRS) equal to 0.195  
358 ( $p < 0.0001$ ). The drug treatment (SPRS = 0.05,  $p = 0.0123$ ), and the drug concentration  
359 (SPRS = 0.039,  $p = 0.016$ ) were both significant. There was also a statistically significant  
360 interaction between the AUC in the control condition, the drug treatment, and the drug  
361 concentration (SPRS = 0.021,  $p < 0.0001$ ). Since their confidence intervals overlap, we  
362 cannot state which of these model components had the greatest effect size. There was  
363 not a significant interaction between the AUC in the control condition and the drug  
364 treatment ( $p = 0.119$ ), or between the AUC in the control condition and the drug  
365 concentration ( $p = 0.171$ ). (*cf.* Fig. 4; for model, see METHODS).

366  
367 Taken together, these data suggested that at physiological cGMP concentrations,  
368 treatment with L-cis-diltiazem essentially locked synaptic  $\text{Ca}^{2+}$  concentrations at a low  
369 level (“constant light”), abolishing cone light responses. D-cis-diltiazem, on the other  
370 hand, had no significant effect on light-induced  $\text{Ca}^{2+}$  responses in cone photoreceptors.  
371 Since, our results on CNGCs expressed heterologously in *Xenopus* oocytes (see Fig. 1)



372 suggested that the rod channel isoform was more sensitive to L-cis-diltiazem than its  
 373 cone counterpart, the effect of L-cis-diltiazem on rod  $Ca^{2+}$  levels is expected to be even  
 374 stronger.

375  
 376 **Expression of CNGCs in the photoreceptor outer segments**

377 To assess the effects of  $Ca^{2+}$ -channel inhibitors on photoreceptor viability, we used wt  
 378 and *rd1* mice. To ascertain that CNGC was expressed in *rd1* retina in the relevant time  
 379 window, we performed immunostaining for the CNGB1a channel subunit on retinal tissue  
 380 sections collected at six different time-points between post-natal day (P) 11 and 30  
 381 (Supplementary Fig. 8a-c). In addition, as the CNGB1a antibody labelled the  
 382 photoreceptor OS in both genotypes, we used this staining to estimate OS length  
 383 (Supplementary Fig. 8d). We found that while in wt OS length quadrupled between P11  
 384 and P30, it dramatically decreased in *rd1* retina in the same time window. As a proxy for  
 385 photoreceptor degeneration, we measured the thickness of the outer nuclear layer  
 386 (ONL), which contains the photoreceptor cell bodies, within a time window that includes  
 387 most of the unfolding of *rd1* photoreceptor degeneration (P11 to 30). Linear mixed effect  
 388 models revealed statistically significant effects of genotype and post-natal day,  
 389 explaining the variability of OS length and ONL thickness data (Table 5). A Brown-  
 390 Forsythe test indicated heterogeneity of variance of the fitted model residuals, however,  
 391 this was not deemed to significantly affect results since linear-mixed models have been  
 392 shown to be robust against this violation [36]. A post-hoc test using custom contrasts  
 393 was used to compare wt and *rd1* least-square (LS) means difference between post-natal  
 394 day P11 to 18, for both OS length (wt:  $13.73 \pm 2.05 \mu\text{m}$ ;  $F(1, 25.25) = 44.6828$ ;  $p <$   
 395  $0.0001$ , *rd1*:  $3.99 \pm 2.03 \mu\text{m}$ ;  $F(1, 24.44) = 3.8582$ ;  $p = 0.0610$ ) and ONL thickness (wt:  
 396  $1.46 \pm 5.25 \mu\text{m}$ ;  $F(1, 25.99) = 0.0780$ ;  $p = 0.7822$ ) *rd1*:  $43.31 \pm 5.13 \mu\text{m}$ ;  $F(1, 24.18) =$   
 397  $71.1854$ ;  $p < 0.0001$ ).

398 In summary, in *rd1* retina ONL loss was correlated with a massive reduction in OS  
 399 length. Nonetheless, at the beginning of the *rd1* degeneration (~P10), CNGC expression,  
 400 as assessed via OS length, was still comparable to that in wt animals (average P11 OS  
 401 length LS means difference between wt and *rd1*  $0.18 \pm 2.05 \mu\text{m}$ ,  $F(1, 25.25) = 0.0078$ ;  
 402  $p = 0.9304$ ). This suggests that the window-of-opportunity for a treatment that targets  
 403 CNGC reaches until at least P11.

|              | OS length<br>n = 109, $R^2_{\text{adj.}} = 0.96$ |         | ONL thickness<br>n = 109, $R^2_{\text{adj.}} = 0.93$ |         |
|--------------|--------------------------------------------------|---------|------------------------------------------------------|---------|
| Fixed effect | F-statistic                                      | p-value | F-statistic                                          | p-value |
| genotype     | $F(1, 25.25) = 0.0078$                           | 0.9304  | $F(1, 25.99) = 2.6450$                               | 0.1159  |

|                                          |                         |          |                         |          |
|------------------------------------------|-------------------------|----------|-------------------------|----------|
| Time-point                               | $F(5, 24.7) = 4.4213$   | 0.0052   | $F(5, 24.77) = 15.1946$ | < 0.0001 |
| Retinal position                         | $F(2, 48.36) = 0.2982$  | 0.7435   | $F(2, 49.39) = 2.9380$  | 0.0623   |
| genotype x time-point                    | $F(5, 24.7) = 13.2699$  | < 0.0001 | $F(5, 24.77) = 12.0885$ | < 0.0001 |
| genotype x retinal position              | $F(2, 48.36) = 0.3245$  | 0.7245   | $F(2, 49.39) = 0.9156$  | 0.4070   |
| timepoint x retinal position             | $F(10, 47.94) = 3.8401$ | 0.0007   | $F(10, 48.41) = 2.0258$ | 0.0508   |
| genotype x time-point x retinal position | $F(10, 47.94) = 4.2248$ | 0.0003   | $F(10, 48.41) = 1.3344$ | 0.2397   |

404

405 **Table 5: Effects explaining the variability of the length of OS with respect to ONL**  
406 **thickness in *rd1* and wt.** Results of the linear mixed-effects models with the dependent  
407 variables OS length and ONL thickness. The models' residuals followed a normal  
408 distribution, while the Brown-Forsythe test indicated a violation of the assumption of  
409 homoscedasticity for both models. However, linear mixed-effects models estimates have  
410 been shown to be robust against such violations [36].

411

### 412 **Proteolytic activity in photoreceptors after treatment with D- and L-cis-diltiazem**

413 The influx of  $Ca^{2+}$  through CNGCs is believed to be driving the degeneration process  
414 via activation of  $Ca^{2+}$ -dependent calpain-type proteases [37]. We investigated the effects  
415 of D- and L-cis-diltiazem treatment on calpain activity, using an *in situ* activity assay on  
416 unfixed retinal tissue sections, and an immunostaining approach detecting activated  
417 calpain-2 [38]. Organotypic retinal tissue cultures derived from wt and *rd1* animals were  
418 treated with D- and L-cis-diltiazem, respectively, from P7 to P11.

419 In wt retina, calpain activity in general and calpain-2 activation specifically was rather  
420 low, when compared to the *rd1* situation where both markers labelled large numbers of  
421 photoreceptors in the ONL (Fig. 5a-d). In both genotypes, treatment with D-cis-diltiazem  
422 had no detectable effect on the numbers of photoreceptors positive for calpain activity or  
423 calpain-2 activation (Fig. 5e-h). Surprisingly, when retinal explants were treated with L-  
424 cis-diltiazem (Fig. 5i-l), calpain-2 activation in the ONL was significantly increased ( $F(1,$   
425  $11.87) = 14.7372$ ;  $p = 0.0024$ ; Fig. 5i, j, n; Table 7). In conclusion, neither D- nor L-cis-  
426 diltiazem caused a statistically significant reduction of overall calpain activity (Fig. 5m, n;  
427 Tables 6, 7) in wt or *rd1* photoreceptors, even though a significant increase in calpain-2  
428 activation was observed.

429 Another type of proteolytic activity, commonly associated with apoptotic cell death, is  
430 the activity of caspase-type proteases. To investigate a possible activation, the *rd1*  
431 treated and untreated retinal tissues were tested for activation of caspase-3, using an  
432 immunostaining approach with an antibody specifically directed against the active  
433 protease [39]. Under all conditions tested, caspase-3 activity was essentially  
434 undetectable in retinal sections (Supplementary Fig. 9, Table 6), thus likely ruling out an

435 important involvement of caspase activity and, by extension, of apoptotic processes in  
436 retinal degeneration, with or without diltiazem treatment.

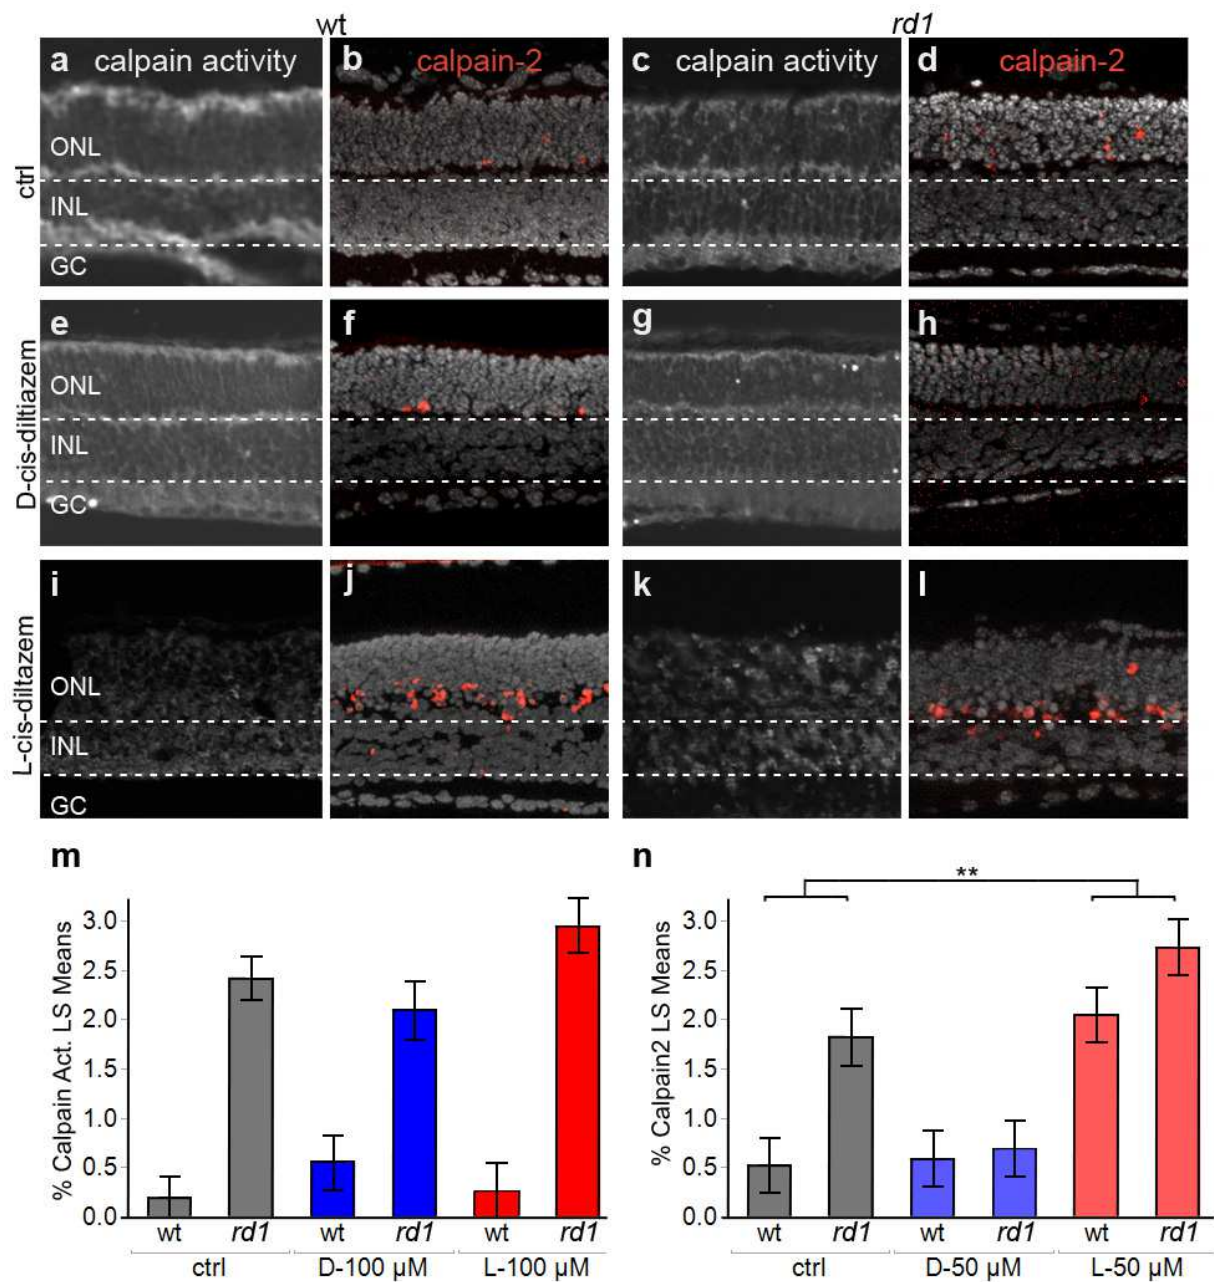

437  
438  
439 **Fig. 5: Effects of diltiazem treatment on calpain activity.** Calpain-activity assay and  
440 immunostaining for activated calpain-2 in wt and *rd1* retina. Untreated retina (ctrl; **a-d**)  
441 was compared to treatment with D-cis diltiazem (**e-h**) or L-cis diltiazem (**i-l**). The bar  
442 graphs show the least-square (LS) means percentages of cells positive for calpain  
443 activity (**m**) and activated calpain-2 (**n**) in wt and *rd1* retina, compared to the untreated  
444 control (ctrl). Asterisks indicate a statistically significant difference from a contrast test  
445 performed between control and 50 μM L-cis-diltiazem treatment (L-50 μM). For statistical  
446 analysis, see Tables 6 and 7; error bars represent SEM; \*\* =  $p < 0.01$ .

447

448 **Effect of D- and L-cis-diltiazem on *rd1* photoreceptor degeneration**

449 To evaluate the effect of CNGC and VGCC inhibition on retinal degeneration, we used  
450 the TUNEL assay to quantify the amount of cell death in the ONL [40]. D- and L-cis-  
451 diltiazem were used to treat organotypic retinal explant cultures derived from wt and *rd1*.  
452 In additional experiments, retinal explants derived from more slowly degenerating *rd10*  
453 animals were used [37].

454 As expected, in the ONL of wt retinal explants a relatively low number of cells were  
455 positive for the TUNEL assay, when compared with their *rd1* counterparts (Fig. 6a, b). D-  
456 cis-diltiazem treatment did not elevate the numbers of TUNEL positive, dying cells in the  
457 wt and *rd1* ONL (Fig. 6c, d). In contrast, L-cis-diltiazem treatment (Fig. 6e, f) led to a  
458 clear increase of cell death in both wt ( $F(1, 21.63) = 86.7207, p < 0.0001$ ) and *rd1* retina  
459 ( $F(1, 26.68) = 191.1994, p < 0.0001$ ; Fig. 6g, h), when compared to untreated control.  
460 Quantification of the different diltiazem treatments in wt and *rd1* retina showed a  
461 significant rise in ONL cell death with L-cis-diltiazem treatment (Fig. 6g, h; for statistics  
462 see Tables 6, 7).

463 Interestingly, the distribution of degenerating photoreceptors within the ONL was  
464 altered by the diltiazem treatments. Typically, TUNEL positive cells in the ONL of  
465 untreated retinal explants are uniformly distributed across the whole thickness of the ONL  
466 (Fig. 6a, b). In contrast, in the cultures treated with 100  $\mu$ M L-cis-diltiazem, most of the  
467 dying cells were located close to the outer plexiform layer (OPL) (Fig. 6e, f). A  
468 corresponding quantification revealed that under control conditions dying *rd1*  
469 photoreceptor distributed almost evenly within the ONL (percent *rd1* dying cells in inner  
470 half of ONL =  $60 \pm 3\%$ ). With D-cis-diltiazem treatment  $57 \pm 4\%$  of dying cells were  
471 localized to the same space, while with L-cis-diltiazem treatment about  $85 \pm 3\%$  ( $F(1,$   
472  $10.42) = 54.2025, p < 0.0001$ ; Tables 6,7) of the TUNEL positive cells were located in  
473 the lower half of the ONL (Fig. 6i).

474 Finally, a study on *rd10* retina yielded results similar to what was seen for the *rd1*  
475 situation: 100  $\mu$ M D-cis-diltiazem had no significant effect on cell death, while 100  $\mu$ M L-  
476 cis-diltiazem treatment produced a strong increase in photoreceptor cell death ( $F(1,$   
477  $9.25) = 42.9966, p < 0.0001$ ; Fig. 6j).

478 Taken together, our data indicate that L-cis-diltiazem treatment in wt retina was toxic  
479 to photoreceptors at all concentrations tested. Curiously, in *rd1* retina L-cis-diltiazem  
480 became toxic only at concentrations above 50  $\mu$ M. In comparison, D-cis-diltiazem, up to  
481 100  $\mu$ M, did not detectably influence cell viability in either wt-, *rd1*-, or *rd10*- retinas. More



482 importantly, both diltiazem enantiomers failed to show any protective effects in *rd1* or  
 483 *rd10* mutant retina.

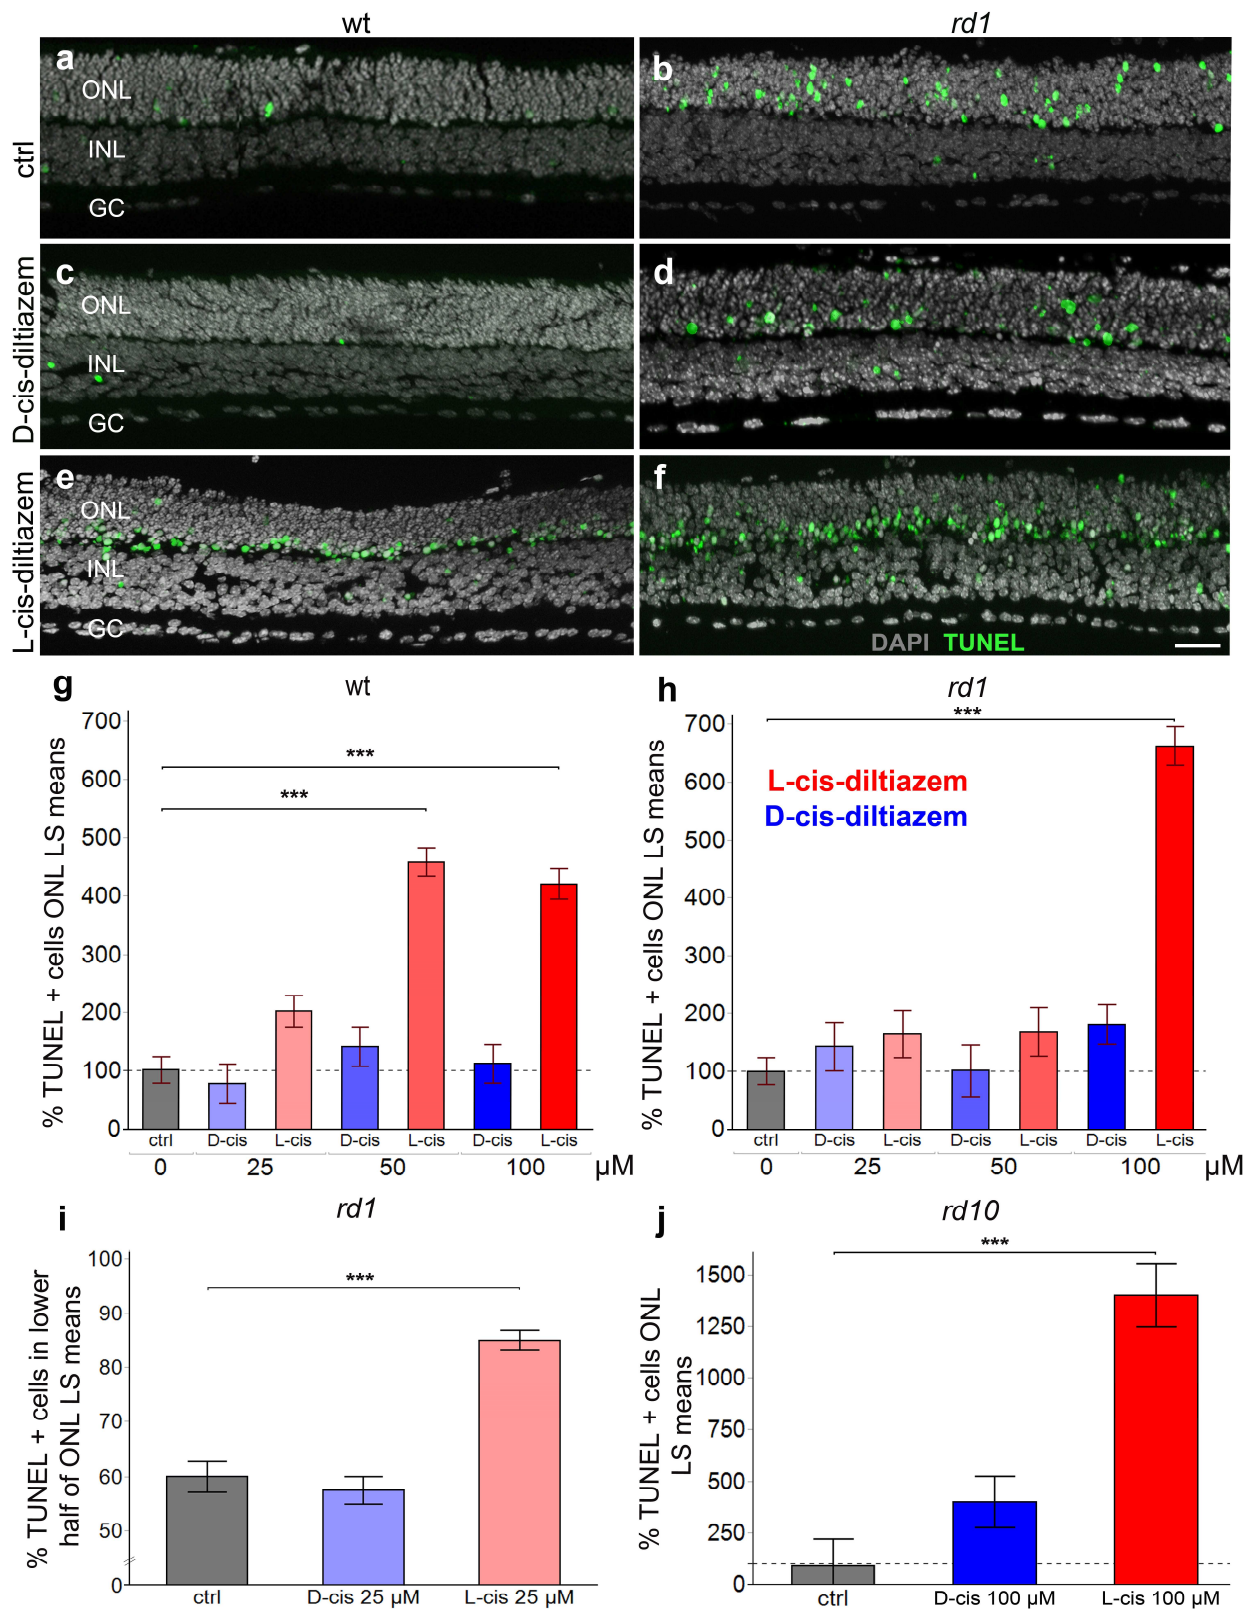

484

485 **Fig. 6: Effects of D- and L-cis-diltiazem on retinal cell viability.** The TUNEL assay  
 486 was used to label dying cells (green) in wt and *rd1* retinal explant cultures. DAPI (grey)  
 487 was used as a nuclear counterstain. Control retina (untreated; **a, b**) was compared to  
 488 retina treated with either 50  $\mu$ M of D- (**c, d**) or L-cis-diltiazem (**e, f**). Note the large

489 numbers of dying cells in the *rd1* outer nuclear layer (ONL). The bar charts show the  
 490 least-square (LS) means percentage of TUNEL positive cells as a function of diltiazem  
 491 concentration, for wt (**g**) and *rd1* (**h**) retina, as a function of localization with respect to  
 492 the outer plexiform layer (OPL) (**i**), and for *rd10* retina (**j**), respectively. In wt, *rd1*, and  
 493 *rd10* retina treatment with L-cis-diltiazem strongly increased the numbers of TUNEL  
 494 positive cells in the ONL. Statistical significance was analysed by post-hoc contrast test  
 495 (cf. Table 7), errors bars represent SEM, \*\*\* =  $p < 0.001$ . INL = inner nuclear layer, GC  
 496 = ganglion cell layer. Scale bar = 50 $\mu$ m.

497  
 498 When comparing the percentages of dying *rd1* photoreceptors cells at P11 (*i.e.*  
 499 TUNEL positive cells) with the corresponding values of calpain activity positive cells,  
 500 under control conditions, the ratio between these two values was 1.09 (calpain activity  
 501 positive cells / TUNEL positive cells; cf. Figs. 5, 6). However, the D-cis-diltiazem  
 502 treatment lowered this ratio ~2.5 times to 0.4, while L-cis-diltiazem treatment decreased  
 503 it ~6 times to 0.17. These changes in the proportions of calpain to TUNEL positive cells  
 504 indicate that intracellular  $Ca^{2+}$  levels were indeed reduced by the diltiazem treatments.  
 505 However, at the same time, cell death levels either remained constant (D-cis-diltiazem)  
 506 or even increased (L-cis-diltiazem), indicating that this form of cell death must be largely  
 507  $Ca^{2+}$  independent.

| Dependent variable     | Genotype                                                                     | Fixed effect               | Normality of residuals | Homo-scedasticity | F-statistic           | p-value  |
|------------------------|------------------------------------------------------------------------------|----------------------------|------------------------|-------------------|-----------------------|----------|
| TUNEL                  | wt (35)<br>R <sup>2</sup> <sub>adj.</sub> = .80<br>n = 336                   | Concentration <sup>1</sup> | Yes                    | No                | F(3, 17.92) = 20.7656 | <0.0001  |
|                        |                                                                              | Treatment                  |                        |                   | F(1, 303.74) = 0.171  | 0.6795   |
|                        |                                                                              | Concentration x Treatment  |                        |                   | F(3, 22.8) = 29.6038  | <0.0001  |
|                        | <i>rd1</i> (36)<br>R <sup>2</sup> <sub>adj.</sub> = .88<br>n = 331           | Concentration <sup>1</sup> | Yes                    | No                | F(3, 24.82) = 37.8570 | < 0.0001 |
|                        |                                                                              | Treatment                  |                        |                   | F(1, 306.63) = 0.0787 | 0.7792   |
|                        |                                                                              | Concentration x Treatment  |                        |                   | F(3, 27.75) = 31.0649 | <0.0001  |
|                        | <i>rd10</i> (10)<br>R <sup>2</sup> <sub>adj.</sub> = .84<br>n = 112          | Concentration <sup>4</sup> | Yes                    | No                | F(1, 8.11) = 25.9134  | <0.0009  |
|                        |                                                                              | Treatment                  |                        |                   | F(1, 100.96) = 0.0026 | 0.9598   |
|                        |                                                                              | Concentration x Treatment  |                        |                   | F(1, 10.43) = 23.5461 | <0.0006  |
| Calpain activity       | wt (11) & <i>rd1</i> (11)<br>R <sup>2</sup> <sub>adj.</sub> = .86<br>n = 143 | Concentration <sup>4</sup> | Yes                    | No                | F(1, 16.41) = 99.2752 | <0.0001  |
|                        |                                                                              | Treatment                  |                        |                   | F(2, 16.41) = 0.793   | 0.4691   |
|                        |                                                                              | Concentration x Treatment  |                        |                   | F(2, 16.41) = 2.055   | 0.1598   |
| Calpain- 2             | wt (9) & <i>rd1</i> (9)<br>R <sup>2</sup> <sub>adj.</sub> = .83<br>n = 117   | Genotype                   | Yes                    | No                | F(1, 12.14) = 9.0927  | 0.0106   |
|                        |                                                                              | Treatment                  |                        |                   | F(2, 12.14) = 20.2775 | 0.0001   |
|                        |                                                                              | Genotype x Treatment       |                        |                   | F(2, 12.14) = 2.2535  | 0.1471   |
| Caspase-3              | <i>rd1</i> (11)<br>R <sup>2</sup> <sub>adj.</sub> = .04<br>n = 58            | Treatment                  | Yes                    | Yes               | F(2, 7.15) = 0.3799   | 0.6970   |
| ONL localisation TUNEL | <i>rd1</i> (9)<br>R <sup>2</sup> <sub>adj.</sub> = .72<br>n = 53             | Treatment                  | Yes                    | No                | F(2, 10.11) = 49.4033 | <0.0001  |

Treatment: {D-cis-diltiazem, L-cis-diltiazem}, <sup>1</sup>{0, 25, 50, 100  $\mu$ M}, <sup>2</sup>{0, 25  $\mu$ M}, <sup>3</sup>{0, 50  $\mu$ M}, <sup>4</sup>{0, 100  $\mu$ M}

508

509 **Table 6: Data analysis using linear mixed-effects models.** Shown are the effects that

510 explain the variability of the dependent variables TUNEL, calpain activity, calpain-2  
 511 positive cells, as well as localization of TUNEL positive cells within the ONL. All models  
 512 included the animal as a random effect to account for repeated measures. Numbers in  
 513 brackets indicate the total number of animals used per genotype, n represents the  
 514 number of observations used in the model. Normality of residuals was assessed visually;  
 515 heterogeneity of residual variances (homoscedasticity) was tested with the Brown-  
 516 Forsythe test. Linear mixed-effects models have been shown to be robust against  
 517 violations of model assumptions.

518  
 519

|                                           | Contrast<br>LS means<br>[95% confidence interval] (%) |                                                       | LS means<br>diff. ± SE (%) | F-statistic            | p-value  |
|-------------------------------------------|-------------------------------------------------------|-------------------------------------------------------|----------------------------|------------------------|----------|
| ONL<br>localisation<br>TUNEL              | <i>rd1</i> ctrl<br>59.98<br>[54.04, 65.92]            | <i>rd1</i> D-25 µM<br>57.44<br>[52.05, 62.83]         | 2.54 ± 3.79                | F(1, 16.33) = 0.4511   | 0.5112   |
|                                           |                                                       | <i>rd1</i> L-25 µM<br>85.03<br>[79.70, 90.36]         | 25.05 ± 3.40               | F(1, 10.42) = 54.2025  | < 0.0001 |
| Calpain-2                                 | <i>rd1</i> ctrl<br>1.82<br>[1.20, 2.44]               | <i>rd1</i> D-50 µM<br>0.68<br>[0.07, 1.30]            | 1.13 ± 0.40                | F(1, 12.52) = 7.9008   | 0.0152   |
|                                           |                                                       | <i>rd1</i> L-50 µM<br>2.73<br>[2.11, 3.35]            | 0.91 ± 0.40                | F(1, 12.69) = 5.0979   | 0.0423   |
|                                           | wt ctrl<br>0.52<br>[0.09, 1.13]                       | wt L-50 µM<br>2.04<br>[1.43, 2.66]                    | 1.52 ± 0.39                | F(1, 11.87) = 14.7372  | 0.0024   |
| TUNEL                                     | <i>rd1</i> ctrl<br>98.10<br>[50.88, 145.32]           | <i>rd1</i> D-100 µM<br>180.85<br>[111.06, 250.63]     | 82.75 ± 41.14              | F(1, 28.11) = 4.0454   | 0.0540   |
|                                           | <i>rd1</i> ctrl<br>101.96<br>[54.54, 149.38]          | <i>rd1</i> L-100 µM<br>661.96<br>[593.66, 730.26]     | 560.00 ± 40.99             | F(1, 26.68) = 191.1994 | <0.0001  |
|                                           | <i>rd10</i> ctrl<br>90.68<br>[201.44, 382.81]         | <i>rd10</i> D-100 µM<br>401.33<br>[111.58, 691.07]    | 310.60 ± 178.75            | F(1, 8.10) = 3.0200    | 0.1200   |
|                                           | <i>rd10</i> ctrl<br>93.60<br>[198.61, 385.80]         | <i>rd10</i> L-100 µM<br>1403.14<br>[1060.80, 1745.48] | 1310.00 ± 199.71           | F(1, 9.25) = 42.9966   | <0.0001  |
|                                           | wt ctrl<br>105.35<br>[58.38, 152.32]                  | wt D-100 µM<br>112.44<br>[43.49, 181.39]              | 7.10 ± 39.87               | F(1, 19.17) = 0.0316   | 0.8607   |
|                                           | wt ctrl<br>98.28<br>[51.36, 145.21]                   | wt L-50 µM<br>458.14<br>[406.36, 509.93]              | 359.90 ± 33.31             | F(1, 18.59) = 116.6931 | <0.0001  |
| wt L-100 µM<br>420.42<br>[366.06, 474.78] |                                                       | 322.10 ± 34.59                                        | F(1, 21.63) = 86.7207      | <0.0001                |          |

520  
 521

522 **Table 7: Post-hoc analysis of the linear mixed-effects models.** Results of contrast  
 523 tests comparing the least-square means, which resulted from the linear mixed-effects  
 524 models shown in Table 6.

525  
 526



527 **III. DISCUSSION**

528 While Ca<sup>2+</sup>-permeable channels have been studied very extensively as potential  
529 targets for the therapy of retinal diseases, numerous attempts to block photoreceptor  
530 Ca<sup>2+</sup>-influx for therapeutic purposes have been unsuccessful to date (reviewed in [20]).  
531 Here, we show that diltiazem enantiomers were highly effective at blocking photoreceptor  
532 Ca<sup>2+</sup> influx through CNGCs at pathologically high cGMP concentrations, likely by  
533 blocking the channel's pore. Yet, unexpectedly, this block neither reduced activity of Ca<sup>2+</sup>  
534 dependent calpain-type proteases, nor did it result in photoreceptor protection. These  
535 results raise the question whether Ca<sup>2+</sup>-permeable channels are suitable targets for  
536 therapeutic interventions, and furthermore, whether high intracellular Ca<sup>2+</sup> *per se*, can  
537 still be considered a driver of photoreceptor death.

538 **Effect of D- and L-cis-diltiazem on photoreceptor CNGCs**

539 Until now, in the CNGC field, diltiazem has only been used as a tool to characterize  
540 various aspects of CNGC activity or to verify the presence of heterotetrameric CNGCs in  
541 heterologous expression systems. [22, 26, 41]. Although previous studies on retinal  
542 degeneration found that the photoreceptor CNGC is one of the main targets of elevated  
543 cGMP, conclusive studies showing the efficacy of diltiazem are still missing. We  
544 characterized the effect of D- and L-cis-diltiazem on retinal CNGC isoforms  
545 heterologously expressed in *Xenopus* oocytes, under different cGMP levels, voltages,  
546 and diltiazem concentrations. We found that at physiological cGMP, neither D- nor L-cis-  
547 diltiazem showed an appreciable effect on CNGC. In the presence of high cGMP  
548 concentrations, both diltiazem enantiomers reduced CNGC activity, although L-cis-  
549 diltiazem had a much stronger inhibitory effect than D-cis-diltiazem, and this effect was  
550 stronger on rod- than on cone-CNGC.

551 To date electrophysiological recordings from single photoreceptors of retinal disease  
552 models are very rare [42]. Still, we may expect *rd1* rod photoreceptors to be in a  
553 permanently depolarized state due to the high CNGC activity triggered by high cGMP.  
554 We indeed found a strong voltage dependence of the diltiazem-inhibitory effect, with a  
555 maximum at depolarizing voltages. This would suggest that a disease-induced  
556 photoreceptor depolarization will amplify the diltiazem-induced inhibition of CNGCs.

557 **D- and L-cis-diltiazem - blocking mechanism of photoreceptor CNGCs**

558 Earlier studies on photoreceptor CNGC suggested several binding sites for diltiazem,  
559 either at the pore entrance, on the cytoplasmic side of the channel [23], or within the

560 channel pore, about half-way across the membrane [43]. Recently, L-cis-diltiazem was  
561 shown to block the voltage-gated  $\text{Ca}^{2+}$ -channel (bacterial CavAb and rabbit  $\text{Ca}_v1.1$ ) by  
562 blocking its conductive pathway [44, 45]. Nevertheless, in case of CNGC, the inhibitory  
563 effect could be also due to a disturbed cGMP binding to the channel.

564 Herein, we investigated the effect of L-cis-diltiazem on cGMP binding to CNGCs by  
565 means of cPCF. Our data suggest that L-cis-diltiazem acts by blocking the channel pore  
566 and affecting the flow of ions across the membrane. Our conclusion is based on several  
567 observations: (1) the time delay observed between channel activation and diltiazem  
568 block, (2) the time delay observed between diltiazem removal and channel closure and  
569 the acceleration of diltiazem removal by the concomitant channel deactivation, and (3)  
570 the undisturbed cGMP binding in the presence of diltiazem. Moreover, the fast and the  
571 slow component observed during L-cis-diltiazem washout from the open channel may  
572 indicate the existence of several binding pockets within the channel's pore, with different  
573 affinities.

574 Although L-cis-diltiazem had only a moderate influence on the channel's deactivation  
575 kinetic, we observed a negative influence on the cooperativity between CNGC subunits.  
576 Together with the fact that L-cis-diltiazem only inhibits heterotetrameric channels [26],  
577 this suggests a direct interaction between diltiazem and the modulatory subunits, rod  
578 CNGB1a and cone CNGB3, respectively. Future studies based on molecular-docking  
579 approaches may shed new light on the exact location of the diltiazem binding site within  
580 the channel's pore and its biophysical characteristics.

581

## 582 **An integrated view on $\text{Ca}^{2+}$ flux in photoreceptor degeneration**

583 Photoreceptor degeneration in hereditary retinal diseases has long been proposed to  
584 be caused by excessive  $\text{Ca}^{2+}$  influx [13, 46], sometimes referred to as the “high  $\text{Ca}^{2+}$   
585 hypothesis”. In terms of phototransduction activity this hypothesis relates to a situation  
586 of constant darkness, *i.e.* high levels of cGMP, constant activation of CNGC, and thus  
587 high  $\text{Ca}^{2+}$  levels in photoreceptor OS. However, an alternative hypothesis suggested that  
588 photoreceptor death might be triggered by too low  $\text{Ca}^{2+}$ , something that has been termed  
589 the “low  $\text{Ca}^{2+}$  hypothesis” [47].

590 In the following, we will discuss our data in view of what is known about  $\text{Ca}^{2+}$  fluxes in  
591 the different photoreceptor compartments (Fig. 7a), under different experimental

592 conditions, and will attempt to resolve some of the apparent contradictions between high  
593 and low  $\text{Ca}^{2+}$  hypotheses.

594 When considering possible pathological mechanisms, we must keep in mind that the  
595 phototransduction cascade itself is  $\text{Ca}^{2+}$ -modulated. For instance, in wt photoreceptors,  
596 under dark conditions (Fig. 7b), the guanylyl cyclase and therefore cGMP synthesis is  
597 inhibited by  $\text{Ca}^{2+}$  via guanylyl cyclase activating protein (GCAP) [48], the cGMP affinity  
598 of CNGC is reduced via a  $\text{Ca}^{2+}$ -calmodulin pathway [49], and the  $\text{Ca}^{2+}$  influx through  
599 VGCC can trigger a  $\text{Ca}^{2+}$ -induced release of  $\text{Ca}^{2+}$  from endoplasmic reticulum [50].  
600 During illumination these processes are reversed, cGMP-level drops, CNGC and then  
601 VGCC close, and  $\text{Ca}^{2+}$  levels in OS and synapse decrease (Fig. 7c).

602 In wt retina, with relatively low cGMP levels and the CNGCs mostly closed, we  
603 expected no major CNGC inhibition by either D- or L-cis-diltiazem, as observed from the  
604 experiments on heterologously expressed channels. D-cis-diltiazem, will, however, block  
605 VGCC, reducing  $\text{Ca}^{2+}$  influx into cell body and synapse (Fig. 7d). Surprisingly, our  $\text{Ca}^{2+}$ -  
606 imaging data, obtained on wt photoreceptors, showed that L-cis-diltiazem reduced  
607 synaptic  $\text{Ca}^{2+}$  levels more strongly than D-cis-diltiazem. A reason for this observation  
608 could be a direct inhibition of synaptic VGCCs by L-cis-diltiazem (Fig. 7e). What argues  
609 against this explanation is that since D-cis-diltiazem blocks VGCC more strongly than L-  
610 cis-diltiazem [21], we should have detected an even stronger effect on wt photoreceptor  
611 synaptic  $\text{Ca}^{2+}$  levels with D-cis-diltiazem treatment. Yet, D-cis-diltiazem had almost no  
612 effect on synaptic  $\text{Ca}^{2+}$ -levels.

613 An alternative and perhaps more likely explanation for the unexpected effect of L-cis-  
614 diltiazem is that even the smallest inhibition of CNGC would trigger, due to the continuous  
615 NCKX-mediated  $\text{Ca}^{2+}$  efflux, a  $\text{Ca}^{2+}$ -decrease in the OS and the subsequent gradual  
616 disinhibition of guanylyl cyclase. This would raise OS cGMP, leading to stronger CNGC  
617 activation and thus to an increasingly stronger CNGC inhibition by L-cis-diltiazem.  
618 Hence, the photoreceptor would hyperpolarize, closing synaptic VGCC. The concomitant  
619 block of CNGC and lack of VGCC activation may result in a complete block of  $\text{Ca}^{2+}$  influx  
620 and hence a depletion of  $\text{Ca}^{2+}$  from intracellular stores. This may in turn cause SOCE  
621 and  $\text{Ca}^{2+}$  influx via CRAC [11] and, hence, could explain the increased calpain-2  
622 activation observed in photoreceptor cell bodies treated with L-cis-diltiazem (Fig. 7e).  
623 Indeed, VGCC block with diltiazem was recently shown to activate SOCE in vascular  
624 smooth muscle cells [51] and this process is likely to selectively activate calpain-2 [52].  
625 Thus, in photoreceptors, a degeneration that is initially caused by very low  $\text{Ca}^{2+}$  levels

626 may be linked to an excessive increase of  $\text{Ca}^{2+}$  and calpain-2 activity via SOCE, perhaps  
627 explaining the apparent contradiction between the high and low  $\text{Ca}^{2+}$  hypothesis for  
628 neurodegeneration.

629 In *rd1* retina, the loss of PDE6 activity and the concomitant rise in cGMP levels causes  
630 CNGC over-activation, strong photoreceptor depolarization, and likely a constant  
631 opening of VGCCs (Fig. 7f). The elevation of CNGC activity will also trigger over-  
632 activation of NCKX and NKX and thus *rd1* rods may be experiencing ATP depletion,  
633 something which then would stop PMCA-mediated  $\text{Ca}^{2+}$  extrusion in cell body and  
634 synapse. This would lead to an uncontrolled rise in intracellular  $\text{Ca}^{2+}$  levels and is in line  
635 with the observed activation of calpain-type proteases in photoreceptor cell body and  
636 synapse.

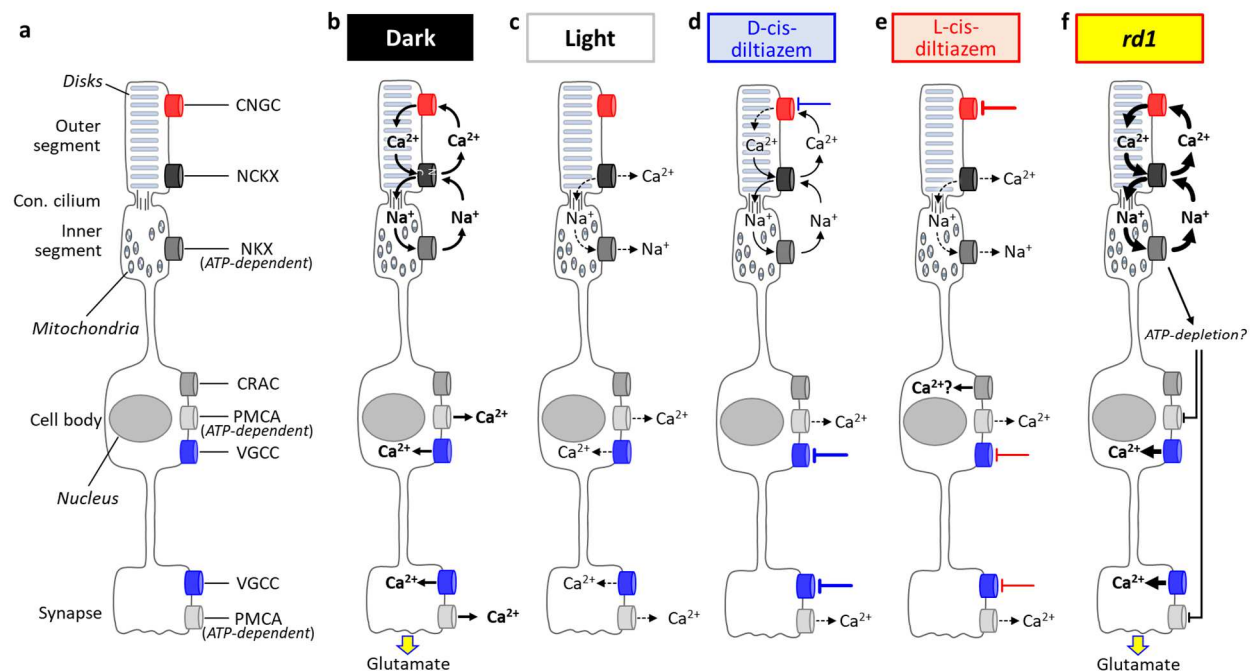

637

638 **Fig. 7: Schematic representation of photoreceptor  $\text{Ca}^{2+}$  flux under different**  
639 **experimental conditions.** (a) The phototransduction cascade is compartmentalized to  
640 the photoreceptor outer segments, which harbour cyclic nucleotide-gated channel  
641 (CNGC) and  $\text{Na}^+/\text{Ca}^{2+}/\text{K}^+$  exchanger (NCKX). The connecting cilium links outer to inner  
642 segment, which holds almost all mitochondria and the ATP-driven  $\text{Na}^+/\text{K}^+$  exchanger  
643 (NKX). The cell body harbours the nucleus as well as  $\text{Ca}^{2+}$ -release activated channel  
644 (CRAC), plasma membrane  $\text{Ca}^{2+}$ -ATPase (PMCA), and voltage-gated  $\text{Ca}^{2+}$  channels  
645 VGCC. PMCA and VGCC are also found in the synapse. (b) In the dark there is a  
646 continuous flux of  $\text{Ca}^{2+}$  ions entering the outer segment via CNGC and exiting via NCKX.  
647 The  $\text{Na}^+$  gradient needed to drive NCKX is maintained by the ATP-dependent NKX in the  
648 inner segment. The flux of  $\text{Na}^+$  and  $\text{Ca}^{2+}$  ions across the photoreceptor membrane (*i.e.*  
649 the dark current) keeps the cell in a continuously depolarized state. At the same time, in  
650 the photoreceptor cell body and synapse, VGCC allows for  $\text{Ca}^{2+}$  influx, mediating  
651 synaptic glutamate release. In the cell body and synapse  $\text{Ca}^{2+}$  is extruded by the ATP-

652 dependent PMCA. (c) In light CNGC closes, while  $\text{Ca}^{2+}$  continues to exit the cell via  
653 NCKX, leading to photoreceptor hyperpolarization. This in turn closes VGCC, ending  
654 synaptic glutamate release. (d) D-cis-diltiazem (blue lines) inhibits predominantly VGCC,  
655 with a partial block on CNGC at high concentrations. (e) L-cis-diltiazem (red lines) blocks  
656 predominantly CNGC, with an additional block on VGCC at high concentrations. This  
657 resembles a situation of “constant light” and may cause a depletion of intracellular  $\text{Ca}^{2+}$   
658 and secondary  $\text{Ca}^{2+}$  influx via activation of CRAC. (f) In *rd1* photoreceptors high cGMP  
659 continuously opens CNGC, representing a situation of “constant darkness”. Possibly,  
660 excessive NKX activity in *rd1* causes a depletion of ATP, preventing  $\text{Ca}^{2+}$  extrusion via  
661 PMCA.

---

662

### 663 **Can diltiazem restore $\text{Ca}^{2+}$ homeostasis in photoreceptors?**

664 In rod photoreceptor diseases like RP, where a treatment may aim to prevent  
665 excessive  $\text{Ca}^{2+}$  influx into the rod OS, while still preserving cone functionality, a strong  
666 rod over cone selectivity is highly desirable. In the present study, we found the CNGC  
667 blocker L-cis-diltiazem to have this desired trait, to show a reasonably good rod vs. cone  
668 selectivity. However, we were unable to demonstrate a protective effect of L-cis-diltiazem  
669 on *rd1* retina – even though L-cis-diltiazem was highly effective on heterologously-  
670 expressed rod CNGC, and these channels were expressed in *rd1* photoreceptors during  
671 the treatment period. Even worse, at higher concentrations, L-cis-diltiazem showed  
672 obvious signs of toxicity, in wt, *rd1*, and *rd10* retina. Thus, the effects of pharmacological  
673 inhibition with L-cis-diltiazem appear to be different from the effects of genetic inactivation  
674 of CNGC in *rd1 \* Cngb1<sup>-/-</sup>* double-mutant mouse [12]. Then again, loss-of-function  
675 mutations in CNGC genes cause photoreceptor degeneration in both RP [53] and ACHM  
676 [54]. Hence, on a genetic level, low activity of CNGC and decreased  $\text{Ca}^{2+}$  influx into  
677 photoreceptor outer segments is clearly connected to photoreceptor degeneration.

678 An explanation for the discrepant results on genetic and pharmacological CNGC  
679 inactivation in *rd1* retina could be the assembly of CNGA1 homotetrameric channels in  
680 the absence of the CNGB1a subunit [55]. While rod photoreceptors may fail to efficiently  
681 target homomeric CNGA1 channels to the outer segment plasma membrane [56], in the  
682 *rd1 \* Cngb1<sup>-/-</sup>* double-mutant situation, homomeric CNGA1 channels may still allow for a  
683 low level of  $\text{Ca}^{2+}$  influx into the photoreceptor, with baseline activity of VGCC enabling  
684 additional  $\text{Ca}^{2+}$  influx. In contrast, in our experiments, at high doses of L-cis-diltiazem,  
685  $\text{Ca}^{2+}$  influx via CNGC was strongly inhibited, likely resulting in cell death due to depletion  
686 of intracellular  $\text{Ca}^{2+}$  stores and activation of SOCE (see above). Independent of SOCE,  
687 low photoreceptor  $\text{Ca}^{2+}$  levels will result in disinhibition of guanylyl cyclase and



688 exceedingly high cGMP production, which may then kill photoreceptors via over-  
689 activation of cGMP-dependent protein kinase G (PKG) [5, 57].

690 Incidentally, inhibition of VGCC with D-cis-diltiazem in our hands also failed to show  
691 significant photoreceptor protection. This is in line with a number of earlier studies  
692 (reviewed in [20]) and corroborates on a pharmacological level our previous study  
693 employing the *rd1* \* *Cacna1f*<sup>-/-</sup> double-mutant mouse, *i.e.* an *rd1* mouse in which the  
694 synaptic VGCC was dysfunctional [19]. In contrast to L-cis-diltiazem, D-cis-diltiazem did  
695 not appear to be overly retinotoxic even at high concentrations. This may correspond to  
696 the genetic situation where loss-of-function mutations in VGCC impair synaptic  
697 transmission from photoreceptors to second order neurons. In humans such mutations  
698 can cause night-blindness, but do not usually cause photoreceptor degeneration [58].  
699 However, activity of VGCC seems relevant for mediating calpain activation in  
700 photoreceptors.

701

### 702 **Calpain activity, Ca<sup>2+</sup>, and cell death**

703 Previously, we had proposed that calpain activation in dying photoreceptors was  
704 mediated by CNGC, triggered by high intracellular cGMP-levels [37]. Considering our  
705 current data, this simple chain of causality may be incorrect. The activity of calpain that  
706 we observed appeared to be localized predominantly to the photoreceptor cell body and  
707 the synaptic region. In fact, calpain activity was conspicuously absent from the OS where  
708 the highest CNGC-dependent Ca<sup>2+</sup> influx would be expected. The low mobility of Ca<sup>2+</sup>  
709 ions from OS to the rest of the photoreceptor cell [16, 59, 60] argues against the  
710 possibility of Ca<sup>2+</sup> flowing into the OS via CNGC and activating calpain in the cell body  
711 and beyond. However, calpain activation could be mediated indirectly by voltage-  
712 dependent Ca<sup>2+</sup> influx via VGCC expressed in cell body and synapse. This would be in  
713 line with our previous study, where genetic inactivation of VGCC strongly reduced calpain  
714 activity in *rd1* photoreceptors [19]. Hence, the chain of causality leading from high cGMP  
715 to calpain activation is likely to include VGCC mediated Ca<sup>2+</sup> influx.

716 In addition, we found that the ratio between dying and calpain positive cells was  
717 strongly reduced by treatment with either of the two diltiazem enantiomers, notably,  
718 without an overall reduction of cell death. This suggests that calpain activity found in  
719 disease models may be a secondary event, *i.e.* a process that contributes to the  
720 degeneration of photoreceptors but that is by itself not a significant cause of cell death.

721 Excessive  $\text{Ca}^{2+}$  influx via CNGC and/or VGCC has for a long time been suggested as  
722 a major driver for photoreceptor cell death [12, 46]. However, follow-up studies have  
723 produced contradictory results, raising the question as to whether CNGC, VGCC, or  $\text{Ca}^{2+}$   
724 as such, really are disease drivers [20]. Our present study sheds light onto this enigma  
725 and demonstrates that both D- and L-cis enantiomers of the anti-hypertensive drug  
726 diltiazem can reduce photoreceptor  $\text{Ca}^{2+}$  influx. Remarkably, treatment with either  
727 compound and inhibition of either VGCC or CNGC did not result in photoreceptor  
728 protection. Moreover, the use of L-cis-diltiazem and the concomitant reduction of  $\text{Ca}^{2+}$   
729 influx had strong detrimental effects on photoreceptor viability, indicating that  $\text{Ca}^{2+}$ -influx  
730 was in fact protective, rather than destructive. Taken together, this suggests the so-called  
731 “low  $\text{Ca}^{2+}$ ” hypothesis as the more likely explanation for photoreceptor degeneration [47].  
732 These findings are highly relevant for therapy development as they shift the focus from  
733  $\text{Ca}^{2+}$ -dependent to cGMP-dependent degenerative mechanisms.



734 **IV. METHODS**

735 **Animals**

736 Mice used for experiments were bred and handled according to the German law on  
737 animal protection. The experimental procedures involving animals were reviewed and  
738 approved by the institutional animal welfare committee of the University of Tübingen.  
739 Animals were maintained in the Tübingen Institute for Ophthalmic Research specified-  
740 pathogen-free (SPF) housing facility, under 12h/12h light/dark cycle, had *ad libitum*  
741 access to food and water, and were used irrespective of gender.

742 For retinal explant cultures C3H/HeA *Pde6b*<sup>rd1/rd1</sup> animals (*rd1*) and their respective  
743 congenic wild-type C3H/HeA *Pde6b*<sup>+/+</sup> counterparts (*wt*) were used [61]. Further studies  
744 were performed on explants derived from C57BL/6J *rd10/rd10* animals (*rd10*) [37]. For  
745 studying light-induced Ca<sup>2+</sup> responses in cone photoreceptors, we used transgenic mice  
746 expressing the Ca<sup>2+</sup> biosensor TN-XL [62] under the human red opsin promoter HR2.1  
747 on a C57BL/6j background [16]. The procedures regarding the *Xenopus laevis* frogs and  
748 the handling of the oocytes had approval from the authorized animal ethics committee of  
749 the Friedrich Schiller University Jena, Germany. The respective protocols were  
750 performed in accordance with the approved guidelines.

751 **Molecular biology and functional expression of heterotetrameric CNGCs in**  
752 ***Xenopus laevis* oocytes**

753 The coding sequences for the retinal CNGC subunits, bovine CNGA1 (NM\_174278.2)  
754 [41] and CNGB1a (NM\_181019.2) [63] from rod photoreceptors and human CNGA3  
755 (NM\_001298.2) [64] and CNGB3 [65] from cone photoreceptors, were subcloned into the  
756 pGEMHE vector [66] for heterologous expression in *Xenopus laevis* oocytes. The cDNA  
757 encoding for the human cone CNGB3 subunit was kindly provided by M. Varnum  
758 (Washington State University, USA) and for the bovine CNGB1a subunit by W. Zagotta  
759 (University of Washington, USA). The surgical removal of oocytes was performed from  
760 adult frog females under anaesthesia (0.3% tricaine; MS-222, Pharmaq Ltd.,  
761 Fordingbridge, UK). The oocytes were treated with collagenase A (3 mg/ml; Roche) for  
762 105 min in Barth's solution containing (in mM) 82.5 NaCl, 2 KCl, 1 MgCl<sub>2</sub>, and 5 HEPES,  
763 pH 7.5. After this procedure, oocytes of stages IV and V were manually dissected and  
764 injected with the genetic material encoding for the CNGC from rod and cone  
765 photoreceptors. For efficient generation of heterotetrameric channels, the ratio of CNGA3  
766 mRNA to CNGB3 mRNA was 1:2.5 [26] and of CNGA1 mRNA to CNGB1a mRNA was  
767 1:4 [67]. After injection, the oocytes were kept at 18°C for 2 to 7 days in Barth's solution

768 containing (in mM) 84 NaCl, 1 KCl, 2.4 NaHCO<sub>3</sub>, 0.82 MgSO<sub>4</sub>, 0.41 CaCl<sub>2</sub>, 0.33  
769 Ca(NO<sub>3</sub>)<sub>2</sub>, 7.5 Tris, cefuroxime (4.0 µg×ml<sup>-1</sup>), and penicillin/streptomycin (100 µg×ml<sup>-1</sup>),  
770 pH 7.4.

## 771 **Electrophysiology**

772 Macroscopic ionic currents were measured with the patch-clamp technique and the  
773 inside-out configuration, using an Axopatch 200B patch-clamp amplifier (Axon  
774 Instruments, Foster City, CA). Recordings were made at room temperature. Current data  
775 were acquired using PATCHMASTER software (HEKA Elektronik, Lambrecht, Germany)  
776 with a sampling frequency of 5 kHz, and low-pass filtered at 2 kHz. From a holding  
777 potential of 0 mV, currents were elicited by voltage steps to -65 mV, then to -35 mV, and  
778 back to 0 mV. When mentioned, also voltage steps to -100 mV and +100 mV were  
779 recorded. The patch pipettes were pulled from borosilicate glass tubing (outer diameter  
780 2.0 mm, inner diameter 1.0 mm; Hilgenberg GmbH, Germany). The initial resistance was  
781 0.6-1.3 MΩ. Intracellular and extracellular solutions contained 140 mM NaCl, 5 mM KCl,  
782 1 mM EGTA, and 10 mM HEPES (pH 7.4). The solutions used for the Ca<sup>2+</sup>-containing  
783 recordings were: 120 mM NaCl, 3 mM KCl, 2 mM NTA, 0.5 mM niflumic acid, 10 mM  
784 HEPES and 1 mM CaCl<sub>2</sub> (pH 7.4) for the extracellular side and 145 mM KCl, 8 mM NaCl,  
785 2 mM NTA, 10 mM HEPES and 0.05 mM CaCl<sub>2</sub> (pH 7.4) for the intracellular side [30].

786 The cyclic nucleotides, cAMP (Merck KGaA, Darmstadt, Germany) or cGMP (Biolog  
787 LSI GmbH & Co KG, Bremen, Germany), were added to intracellular solutions as  
788 indicated. Either D- or L-cis-diltiazem (Abcam - ab120260 and Abcam - ab120532,  
789 respectively, Germany) were added to the cGMP-containing solutions to a final  
790 concentration of 25 µM and 100 µM as required. The diltiazem-containing solutions were  
791 prepared from stock solutions (10 mM) immediately before the experiments. The cGMP-  
792 solutions, or solution mixtures containing cGMP and either D- or L-cis-diltiazem were  
793 administered via a multi-barrel application system to the cytosolic face of the patch.

794 For studying channel's activation and deactivation kinetics in the presence of D- or L-  
795 cis-diltiazem we performed fast jumps of the ligand concentration (from zero to either 3  
796 mM cGMP or 3 mM cGMP + 100 µM D- or L-cis-diltiazem and back to zero) by means  
797 of a double-barrelled θ-glass pipette mounted on a piezo-driven device [68]. The  
798 recording rate was 20 Hz. The solution exchange at the pipette tip was completed within  
799 1 ms [69].

## 800 **Confocal patch-clamp fluorometry (cPCF)**

801 The influence of D- and L-cis-diltiazem on cGMP binding was studied by means of  
802 confocal patch-clamp fluorometry (cPCF). The method has been described in detail  
803 previously [33, 70, 71]. The experiments for measuring ligand binding and channel gating  
804 simultaneously were performed in inside-out macropatches of *X. laevis* oocytes  
805 expressing heterotetrameric rod CNGC, at -35 mV. As fluorescent ligand we used 8-[DY-  
806 547]-AHT-cGMP (f\*cGMP). 8-[DY-547]-AHT-cGMP was prepared in analogy to the  
807 related cyclic nucleotides 8-[DY-547]-AET-cGMP and 8-[DY-547]-AHT-cAMP [33, 35].  
808 To be able to differentiate between the fluorescence of the bound f\*cGMP from the  
809 fluorescence generated by the free f\*cGMP in the bath solution, we used an additional  
810 red dye, DY647 (Dyomics, Jena, Germany), at a concentration of 1  $\mu$ M. Recordings were  
811 performed with an LSM 710 confocal microscope (Carl Zeiss Jena GmbH, Germany) and  
812 were triggered by the ISO3 hard- and software (MFK, Niedernhausen, Germany;  
813 sampling rate 5 kHz, 4-pole Bessel filter set to 2 kHz). Due to the relative long duration  
814 of the experiment, to avoid cell-membrane exposure to damaging amounts of light,  
815 binding was measured under steady-state conditions, during pre-selected time windows  
816 only: in the presence of 10  $\mu$ M f\*cGMP, during the jump to 10  $\mu$ M f\*cGMP + 100  $\mu$ M L-  
817 cis-diltiazem and several times during L-cis-diltiazem removal from the open channels.

### 818 **Colocalization experiments**

819 To verify the correct incorporation of heterotetrameric CNGCs into the oocyte plasma  
820 membrane we labelled the cone CNGB3- and rod CNGB1a-subunit by fusing enhanced  
821 GFP to their intracellularly located C terminus. At first, we introduced an *AvrII* site in  
822 pGEMHE-CNGB1a by site-directed mutagenesis at CNGB1a K1205 which was thereby  
823 changed to R1205. Afterwards, the PCR amplified *EGFP* gene was ligated into the newly  
824 generated *AvrII* site of the pGEHME-CNGB1a construct. To fuse EGFP into CNGB3 C-  
825 terminus, we introduced an *XhoI* site in pGEMHE-CNGB3 by site-directed mutagenesis  
826 at CNGB3 P668 and K669 which were thereby changed to leucine (L668) or glutamate  
827 (E669), respectively. Afterwards, the PCR amplified *EGFP* gene was ligated into the  
828 newly generated *XhoI* site of the pGEHME-CNGB3 construct. The correct insertion of  
829 PCR products was confirmed by DNA sequencing.

830 The oocyte membrane was stained from the extracellular side with fluorescently  
831 labelled lectin (Alexa Fluor™ 633 - wheat germ agglutinin (Alexa-WGA), Invitrogen Life  
832 Technologies Corporation, Eugene, Oregon, red fluorescence signal). For this the  
833 oocytes were incubated in 5  $\mu$ g/ml Alexa-WGA for 7 minutes. Alexa-WGA was excited  
834 with the 633-nm line of a helium neon laser. GFP was excited with the 488-nm line of an

835 argon laser. Fluorescence signals, measured along an imaginary line perpendicular to  
836 the plasma membrane, were quantified by confocal microscopy (LSM 710, Carl Zeiss  
837 Jena GmbH, Jena, Germany). The GFP- and WGA-fluorescence profiles were  
838 constructed using the LSM 710 image analysis software.

### 839 **Analysis of the oocyte data**

840 For concentration-activations relationships, each patch was first exposed to a solution  
841 containing no cGMP and then to a solution containing the saturating concentration of 3  
842 mM cGMP. After subtracting the baseline current from the current amplitude in the  
843 presence of cGMP, the current response for each ligand concentration was normalized  
844 to the saturating current. The experimental data points were fitted using the Hill equation:

$$845 \quad \frac{I}{I_{max}} = \frac{1}{1 + \left(\frac{EC_{50}}{x}\right)^H} \quad (\text{Equation 1})$$

846 where  $I$  is the current amplitude,  $I_{max}$  is the maximum current induced by a saturating  
847 cGMP concentration,  $x$  is the ligand concentration,  $EC_{50}$  is the ligand concentration of  
848 half maximum effect, and  $H$  is the Hill coefficient. The analysis was performed with  
849 OriginPro 2016G software (OriginLab Corporation, Northampton, USA). Experimental  
850 data are given as mean  $\pm$ SEM.

851 The effect of either D- or L-cis- diltiazem was quantified by measuring the cGMP-  
852 induced current, under steady-state conditions at the end of either -100 mV, -35 mV, or  
853 +100 mV pulse, in the presence of diltiazem as required. The amount of diltiazem block  
854 (%) is related to the current at the respective cGMP concentration and the amount of  
855 current decrease in the presence of diltiazem and was calculated as follow (here  
856 exemplified for the 100  $\mu$ M cGMP-induced current):

$$857 \quad \text{diltiazem block (\%)} = 100 - \frac{\frac{I(100\mu\text{M cGMP} + x \mu\text{M Diltiazem})}{I(3\text{mM cGMP} + x \mu\text{M Diltiazem})} \cdot 100}{\frac{I(100\mu\text{M cGMP})}{I(3\text{mM cGMP})}} \quad (\text{Equation 2})$$

859 The time courses for channel activation, deactivation (starting after the respective initial  
860 delay due to diltiazem removal) and diltiazem block were fitted with a single exponential:

$$861 \quad I(t) = A * \exp\left[\frac{-t}{\tau}\right] \quad (\text{Equation 3})$$

862 where  $A$  is the amplitude,  $t$  the time, and  $\tau$  the time constant for either activation,  
863 deactivation, or block.

864 The time course for diltiazem washout was fitted with a double exponential function:

$$865 \quad I(t) = A_1 * \exp\left[\frac{-t}{\tau_{fast}}\right] + A_2 * \exp\left[\frac{-t}{\tau_{slow}}\right] + y_0 \quad (\text{Equation 4})$$

866 where  $A_1, A_2$  are the amplitudes of the fast and slow components,  $t$  the time, and  $\tau_{fast}$  and  
867  $\tau_{slow}$  the time constants for the fast and slow phase of the diltiazem washout.

868 For the statistical analysis of D- and L-cis-diltiazem effect on retinal CNGCs, we used  
869 the two-tailed unpaired Student  $t$ -test. Figures were prepared using CorelDraw X7 (Corel,  
870 Ottawa, Canada)

### 871 **Retinal explant culture**

872 To assess the effects of D- and L-cis-diltiazem on calpain activity and photoreceptor  
873 degeneration, *rd1* retinas were explanted at post-natal day (P5), while retinas from more  
874 slowly degenerating *rd10* animals were explanted at P9. The explants were cultured on  
875 a polycarbonate membrane (Corning-Costar Transwell permeable support, 24 mm  
876 insert, #CLS3412) with complete medium (Gibco R16 medium with supplements) [72].  
877 The R16 medium was exchanged every two days with treatment added at either P7 and  
878 P9, for *rd1*, or at P11, P13, P15 for *rd10* explants. The cultures were treated with 25, 50,  
879 and 100  $\mu\text{M}$  of D- and L-cis-diltiazem, respectively. Cultures were ended on P11 (*rd1*)  
880 and P17 (*rd10*) by fixing the cultures with 4% paraformaldehyde (PFA). The explants  
881 were embedded in Tissuetek (Sakura Finetek Europe B.V.) and sectioned (12  $\mu\text{m}$ ) in a  
882 cryostat (ThermoFisher Scientific, CryoStar NX50 OVP, Runcorn UK).

### 883 **TUNEL staining**

884 The TUNEL (terminal deoxynucleotidyl transferase dUTP nick end labelling) assay kit  
885 (Roche Diagnostics, Mannheim, Germany) was used to label dying cells. Histological  
886 sections from retinal explants were dried and stored at  $-20^\circ\text{C}$ . The sections were  
887 rehydrated with phosphate-buffered saline (PBS; 0.1M) and incubated with Proteinase K  
888 (1.5  $\mu\text{g}/\mu\text{l}$ ) diluted in 50 mM TRIS-buffered saline (TBS; 1  $\mu\text{l}$  enzyme in 7 ml TBS) for 5  
889 mins. This was followed by 3 times 5 minutes TBS washing and incubation with a mixture  
890 of 30% HCl and 70% ethanol for 5 min to increase the accessibility of cells to the enzyme.  
891 Another 3 times 5 minutes washing was followed by incubation with blocking solution  
892 (10% normal goat serum, 1% bovine serum albumin, 1% fish gelatine in phosphate-  
893 buffered saline with 0.03% Tween-20). TUNEL staining solution was prepared using 10  
894 parts of blocking solution, 9 parts of TUNEL labelling solution and 1 part of TUNEL  
895 enzyme. After blocking, the sections were incubated with TUNEL staining solution



896 overnight at 4° C. Finally, the sections were washed 2 times with PBS, mounted using  
897 Vectashield with DAPI (Vector Laboratories Inc, Burlingame, CA, USA) and imaged  
898 under a Zeiss (ApoTome.2) microscope for further analysis.

### 899 **Calpain-activity assay**

900 This assay allows resolving overall calpain activity *in situ*, on unfixed tissue sections  
901 [14]. Retinal tissue sections were incubated and rehydrated for 15 minutes in calpain  
902 reaction buffer (CRB) (5.96 g HEPES, 4.85 g KCl, 0.47 g MgCl<sub>2</sub>, 0.22 g CaCl<sub>2</sub> in 100 ml  
903 ddH<sub>2</sub>O; pH 7.2) with 2 mM dithiothreitol (DTT). The tissue sections were incubated for 2  
904 hours at 37°C in CRB with tBOC-Leu-Met-CMAC (5 µM; Thermofisher Scientific, A6520).  
905 Afterwards, the tissue sections were washed twice in PBS (5 minutes) and mounted  
906 using Vectashield mounting medium (Vector) for immediate visualization under the  
907 ZEISS ApoTome2.

### 908 **Immunohistochemistry**

909 The cryo-sectioned slides were dried for 30 minutes at 37°C and hydrated for 15  
910 minutes. The sections were then incubated with blocking solution (10% NGS, 1% BSA  
911 and 0.3% PBST) for one hour. The primary antibodies CNGB1 (Sigma-Aldrich,  
912 HPA039159; 1:1000), calpain-2 (Abcam, ab39165; 1:300), or caspase-3 (Cell Signalling,  
913 9664; 1:1000) were diluted in blocking solution and incubated overnight at 4°C. Rinsing  
914 with PBS for 3 times 10 minutes each was followed by incubation with secondary  
915 antibody (Molecular Probes, AlexaFluor488 (A01134) or AlexaFluor562 (A11036),  
916 diluted 1:500 in PBS) for one hour. The sections were further rinsed with PBS for 3 times  
917 10 minutes each and mounted with Vectashield containing DAPI (Vector).

### 918 **Microscopy and image analysis in retinal cultures**

919 The images of *ex vivo* retina and organotypic explant cultures were captured using a  
920 Zeiss Imager Z.2 fluorescence microscope, equipped with ApoTome2, an Axiocam 506  
921 mono camera, and HXP-120V fluorescent lamp (Carl Zeiss Microscopy, Oberkochen,  
922 Germany). The excitation ( $\lambda_{Exc.}$ ) / emission ( $\lambda_{Em.}$ ) characteristics of the filter sets used  
923 for the different fluorophores were as follows (in nm): DAPI ( $\lambda_{Exc.} = 369 \text{ nm}$ ,  $\lambda_{Em.} =$   
924  $465 \text{ nm}$ ), AF488 ( $\lambda_{Exc.} = 490 \text{ nm}$ ,  $\lambda_{Em.} = 525 \text{ nm}$ ), and AF562 ( $\lambda_{Exc.} = 578 \text{ nm}$ ,  $\lambda_{Em.} =$   
925  $603 \text{ nm}$ ). The Zen 2.3 blue edition software (Zeiss) was used to capture images (both  
926 tiled and z-stack, 20x magnification). The data were collected from 7-9 different sections  
927 obtained from 3-5 animals. Sections of 12 µm thickness were analysed using 8-12

928 Apotome Z-planes. The positive cells in the ONL were manually quantified, the ONL area  
929 was measured in Zen 2.3 software. The total number of cells in the ONL was calculated  
930 using an average cell (nucleus) size and the percent positive cells was determined with  
931 respect to the total number of cells in the same ONL area. Values were normalized to  
932 control condition (100%).

933 The relative localization of positive cells within the ONL was assessed by dividing the  
934 width of the ONL horizontally into two equal halves (*i.e.* upper and lower half) and  
935 manually quantifying the distribution of positive cells in each of the halves. The chance  
936 level for cell distribution was 50%. The percent of degenerating photoreceptors localized  
937 close to OPL, were analysed by comparing cell count in the lower half of ONL to total  
938 positive cells in the ONL.

939

#### 940 **Statistical analysis for retinal cultures**

941 Linear mixed-effects models were fitted by restricted maximum likelihood estimation  
942 (REML), to assess the significance of the effects in explaining the variations of the  
943 dependent variables. Variance inflation factors (VIF) of the predictor variables were  
944 calculated and assured to fall well below the common threshold value, indicating no  
945 collinearity between them [73]. The residuals were confirmed visually to follow a normal  
946 distribution, while homoscedasticity (homogeneity of the residual variances) was tested  
947 using the Brown–Forsythe test [74] and reported in case of violations.

948 Figures were prepared using Photoshop CS5 (Adobe, San Jose, CA, USA). Statistical  
949 analysis and graph preparation were performed using JMP 15.2.0 (466311, SAS Institute  
950 Inc, Cary, NC, USA).

#### 951 **Two-photon Ca<sup>2+</sup> imaging**

952 Light stimulus-evoked Ca<sup>2+</sup> responses were recorded in cone axon terminals using a  
953 two-photon (2P) microscope, as previously described [75]. In brief, we used adult (~ P90)  
954 transgenic HR2.1:TN-XL mice (for details, see above). After two hours of dark adaptation  
955 [16], the animal was deeply anesthetized with isoflurane (CP-Pharma, Germany), and  
956 then sacrificed by cervical dislocation. All procedures were performed under dim red  
957 illumination. Following enucleation of the eyes, the retinas were dissected and vertically  
958 sliced (~200  $\mu$ m) in artificial cerebral spinal fluid (ACSF), which contained (in mM): 125  
959 NaCl, 2.5 KCl, 2 CaCl<sub>2</sub>, 1 MgCl<sub>2</sub>, 1.25 NaH<sub>2</sub>PO<sub>4</sub>, 26 NaHCO<sub>3</sub>, 0.5 L-glutamine, and 20  
960 glucose (Sigma-Aldrich or Merck, Germany) and was maintained at pH 7.4 with



961 carboxygen (95% O<sub>2</sub>, 5% CO<sub>2</sub>). Next, the slices were transferred to the 2P microscope's  
962 recording chamber and superfused with warmed (37°C) ACSF.

963 The 2P microscope, a customized MOM (Sutter Instruments, Novato, USA; [76]), was  
964 driven by a mode-locked Ti:Sapphire laser (MaiTai-HP DeepSee; Newport Spectra-  
965 Physics, Darmstadt, Germany) tuned to 860 nm. For further technical details on the 2P  
966 setup configuration, see [75]. TN-XL is a ratiometric FRET-based Ca<sup>2+</sup> indicator [62],  
967 therefore we used two detection channels with the appropriate band-pass (BP) filters  
968 (483 BP 32; 535 BP 50; AHF, Tübingen, Germany) to capture both the sensor's donor  
969 ( $F_D$ ; ECFP) and acceptor fluorescence ( $F_A$ ; citrine) simultaneously. The relative Ca<sup>2+</sup> level  
970 in the cone terminals was then represented by the ratio  $F_A/F_D$  (*cf.* Fig. 4b,c). Light stimuli  
971 were presented using a custom-built stimulator [77] with two band-pass filtered LEDs  
972 (UV filter: 360 BP 12; green: 578 BP 10; AHF) mounted below the recording chamber.

973 Before presenting light flashes and recording cone Ca<sup>2+</sup> signals, slices were adapted  
974 to a constant background illumination equivalent to a photoisomerisation rate of  $\sim 10^4$   
975 P\*/cone s<sup>-1</sup> for  $\geq 15$  seconds. Light stimuli consisted of a series of 1-s bright flashes at  
976 0.25 Hz, evoking similar photoisomerisation rates ( $\sim 6.5 \cdot 10^3$  P\*s<sup>-1</sup>/cone) in both mouse  
977 cone types.

978 Stock solutions (100mM) of D- and L-cis-diltiazem were prepared in distilled water and  
979 stored at 4°C. Prior to each experiment, D- or L-cis-diltiazem dilutions were freshly  
980 prepared from the stock in carboxygenated ACSF solution. For bath application, the  
981 tissue was perfused with D- or L-cis-diltiazem (25, 50, or 100  $\mu$ M) added to the bathing  
982 solution for  $\geq 1$  minute before commencing the recording; the perfusion rate was of  $\sim 1.5$   
983 ml/minute. Drug entry into the recording chamber was confirmed by adding  
984 Sulforhodamine 101 (Sigma-Aldrich) to the drug solution.

## 985 **Analysis of Ca<sup>2+</sup> imaging data**

986 To identify the factors (*i.e.* L-cis vs. D-cis, concentration) that are significant for  
987 predicting the response of a cell during drug treatment (a potential change in AUC), we  
988 applied a multivariate linear model [78]. The importance of each factor was estimated as  
989 its impact on the predictive power of the statistical model (*cf.* Fig. 4d). The effect of each  
990 factor was considered both individually and in interactions with the other variables, to  
991 identify which factor or group of factors is best at modelling the AUC values. The  
992 explanatory variables were standardised prior to model fitting, by subtracting the mean  
993 and dividing by the standard deviation of the variable. As before, the statistical

994 assumptions of the linear model were evaluated. The VIF for each explanatory variable  
995 was found to fall below the common threshold, indicating a lower level of multicollinearity.  
996 Visual inspection showed that the residuals were approximately normally distributed. A  
997 Brown-Forsythe test indicated that there was heteroscedasticity in the data, though as  
998 previously noted these models are robust to such variability. The model also incorporated  
999 a random effects term for the recording field, which controlled for recordings where the  
1000 ROIs were on average higher or lower than the mean across all ROIs in all recordings.  
1001 Specifically, the modelling showed that (1) more active cells (higher AUC) were more  
1002 sensitive to the drug application, (2) there was a statistically significant difference  
1003 between the effects of L- and D-cis- diltiazem on the AUC, and (3) the drug concentration  
1004 also had a significant effect on AUC.

1005 The effect size is determined using the method for estimating semi-partial R-squared  
1006 [78] and allowed us to compare the relative impact of each factor in the linear mixed  
1007 effects model (Supplemental Table 3). This method also allowed us to evaluate the fit for  
1008 the whole model (SPRS = 0.368).

1009 **REFERENCES**

- 1010 1. Kennan, A., A. Aherne, and P. Humphries, *Light in retinitis pigmentosa*. Trends  
1011 Genet, 2005. **21**(2): p. 103-110.
- 1012 2. Narayan, D.S., et al., *A review of the mechanisms of cone degeneration in retinitis*  
1013 *pigmentosa*. Acta Ophthalmol, 2016. **94**(8): p. 748-754.
- 1014 3. Hamel, C.P., *Cone rod dystrophies*. Orphanet Journal of Rare Diseases, 2007.  
1015 **2**(1): p. 7.
- 1016 4. Paquet-Durand, F., V. Marigo, and P. Ekström, *RD Genes Associated with High*  
1017 *Photoreceptor cGMP-Levels (Mini-Review)*. Adv Exp Med Biol, 2019. **1185**: p.  
1018 245-249.
- 1019 5. Power, M., et al., *Cellular mechanisms of hereditary photoreceptor degeneration -*  
1020 *Focus on cGMP*. Prog Retin Eye Res, 2020. **74**: p. 100772.
- 1021 6. Kaupp, U.B. and R. Seifert, *Cyclic nucleotide-gated ion channels*. Physiol Rev,  
1022 2002. **82**(3): p. 769-824.
- 1023 7. Wetzel, R.K., E. Arystarkhova, and K.J. Sweadner, *Cellular and Subcellular*  
1024 *Specification of Na,K-ATPase  $\alpha$  and  $\beta$  Isoforms in the Postnatal Development of*  
1025 *Mouse Retina*. The Journal of Neuroscience, 1999. **19**(22): p. 9878-9889.
- 1026 8. Ames, A. and Y.Y. Li, *Energy requirements of glutamatergic pathways in rabbit*  
1027 *retina*. The Journal of Neuroscience, 1992. **12**(11): p. 4234.
- 1028 9. Ingram, N.T., A.P. Sampath, and G.L. Fain, *Membrane conductances of mouse*  
1029 *cone photoreceptors*. J Gen Physiol, 2020. **152**(3).
- 1030 10. Waldner, D.M., N.T. Bech-Hansen, and W.K. Stell, *Channeling Vision: Ca(V)1.4-A*  
1031 *Critical Link in Retinal Signal Transmission*. Biomed Res Int, 2018. **2018**: p.  
1032 7272630.
- 1033 11. Wegierski, T. and J. Kuznicki, *Neuronal calcium signaling via store-operated*  
1034 *channels in health and disease*. Cell Calcium, 2018. **74**: p. 102-111.
- 1035 12. Paquet-Durand, F., et al., *A key role for cyclic nucleotide gated (CNG) channels in*  
1036 *cGMP-related retinitis pigmentosa*. Hum Mol Genet, 2011. **20**(5): p. 941-7.
- 1037 13. Fox, D.A., A.T. Poblenz, and L.H. He, *Calcium overload triggers rod*  
1038 *photoreceptor apoptotic cell death in chemical-induced and inherited retinal*  
1039 *degenerations*. Oxidative/Energy Metabolism in Neurodegenerative Disorders,  
1040 1999. **893**: p. 282-285.
- 1041 14. Vallazza-Deschamps, G., et al., *Excessive activation of cyclic nucleotide-gated*  
1042 *channels contributes to neuronal degeneration of photoreceptors*. Eur J Neurosci,  
1043 2005. **22**(5): p. 1013-22.
- 1044 15. Bowes, C., et al., *Localization of a retroviral element within the rd gene coding for*  
1045 *the beta subunit of cGMP phosphodiesterase*. Proc Natl Acad Sci U S A, 1993.  
1046 **90**(7): p. 2955-9.

- 1047 16. Wei, T., et al., *Light-driven calcium signals in mouse cone photoreceptors*. J  
1048 Neurosci, 2012. **32**(20): p. 6981-94.
- 1049 17. Kulkarni, M., et al., *Calcium dynamics change in degenerating cone*  
1050 *photoreceptors*. Hum Mol. Genet, 2016.
- 1051 18. Wang, T., et al., *The PDE6 mutation in the rd10 retinal degeneration mouse*  
1052 *model causes protein mislocalization and instability and promotes cell death*  
1053 *through increased ion influx*. J Biol Chem, 2018. **293**(40): p. 15332-15346.
- 1054 19. Schon, C., F. Paquet-Durand, and S. Michalakis, *Cav1.4 L-Type Calcium*  
1055 *Channels Contribute to Calpain Activation in Degenerating Photoreceptors of rd1*  
1056 *Mice*. PLoS One, 2016. **11**(6): p. e0156974.
- 1057 20. Barabas, P., P.C. Cutler, and D. Krizaj, *Do calcium channel blockers rescue dying*  
1058 *photoreceptors in the Pde6b ( rd1 ) mouse?* Adv. Exp. Med. Biol, 2010. **664**: p.  
1059 491-499.
- 1060 21. Hart, J., et al., *Inhibitory action of diltiazem on voltage-gated calcium channels in*  
1061 *cone photoreceptors*. Exp Eye Res, 2003. **76**(5): p. 597-604.
- 1062 22. Stern, J.H., U.B. Kaupp, and P.R. MacLeish, *Control of the light-regulated current*  
1063 *in rod photoreceptors by cyclic GMP, calcium, and l-cis-diltiazem*. Proc Natl Acad  
1064 Sci U S A, 1986. **83**(4): p. 1163-7.
- 1065 23. Haynes, L.W., *Block of the cyclic GMP-gated channel of vertebrate rod and cone*  
1066 *photoreceptors by l-cis-diltiazem*. J Gen Physiol, 1992. **100**(5): p. 783-801.
- 1067 24. Cia, D., et al., *Voltage-gated channels and calcium homeostasis in mammalian*  
1068 *rod photoreceptors*. J Neurophysiol, 2005. **93**(3): p. 1468-75.
- 1069 25. Shuart, N.G., et al., *Molecular mechanism for 3:1 subunit stoichiometry of rod*  
1070 *cyclic nucleotide-gated ion channels*. Nat Commun, 2011. **2**: p. 457.
- 1071 26. Peng, C., E.D. Rich, and M.D. Varnum, *Subunit configuration of heteromeric cone*  
1072 *cyclic nucleotide-gated channels*. Neuron, 2004. **42**(3): p. 401-10.
- 1073 27. Pugh, E.N. and T.D. Lamb, *Phototransduction in vertebrate rods and cones:*  
1074 *Molecular mechanism of amplification, recovery and light adaptation*, in *Molecular*  
1075 *Mechanisms in Visual Transduction*, D.G. Stavenga, W.J. DeGrip, and E.N. Pugh  
1076 Jr, Editors. 2000, Elsevier B.V. p. 581.
- 1077 28. Cote, R.H. and M.A. Brunnock, *Intracellular cGMP concentration in rod*  
1078 *photoreceptors is regulated by binding to high and moderate affinity cGMP*  
1079 *binding sites*. J Biol Chem, 1993. **268**(23): p. 17190-8.
- 1080 29. Nakatani, K. and K.W. Yau, *Calcium and light adaptation in retinal rods and*  
1081 *cones*. Nature, 1988. **334**(6177): p. 69-71.
- 1082 30. Frings, S., et al., *Profoundly different calcium permeation and blockage determine*  
1083 *the specific function of distinct cyclic nucleotide-gated channels*. Neuron, 1995.  
1084 **15**(1): p. 169-79.

- 1085 31. Picones, A. and J.I. Korenbrot, *Permeability and interaction of Ca<sup>2+</sup> with cGMP-*  
1086 *gated ion channels differ in retinal rod and cone photoreceptors*. Biophysical  
1087 Journal, 1995. **69**(1): p. 120-127.
- 1088 32. Nache, V., et al., *Hysteresis of ligand binding in CNGA2 ion channels*. Nat  
1089 Commun, 2013. **4**: p. 2866.
- 1090 33. Biskup, C., et al., *Relating ligand binding to activation gating in CNGA2 channels*.  
1091 Nature, 2007. **446**(7134): p. 440-443.
- 1092 34. Zheng, J. and W.N. Zagotta, *Gating rearrangements in cyclic nucleotide-gated*  
1093 *channels revealed by patch-clamp fluorometry*. Neuron, 2000. **28**(2): p. 369-74.
- 1094 35. Nache, V., et al., *Deciphering the function of the CNGB1b subunit in olfactory*  
1095 *CNG channels*. Sci Rep, 2016. **6**: p. 29378.
- 1096 36. Schielzeth, H., et al., *Robustness of linear mixed-effects models to violations of*  
1097 *distributional assumptions*. Methods in Ecology and Evolution, 2020. **11**(9): p.  
1098 1141-1152.
- 1099 37. Arango-Gonzalez, B., et al., *Identification of a common non-apoptotic cell death*  
1100 *mechanism in hereditary retinal degeneration*. PLoS One, 2014. **9**(11): p.  
1101 e112142.
- 1102 38. Power, M.J., et al., *Systematic spatiotemporal mapping reveals divergent cell*  
1103 *death pathways in three mouse models of hereditary retinal degeneration*. J Comp  
1104 Neurol, 2020. **528**(7): p. 1113-1139.
- 1105 39. Nicholson, D.W., et al., *Identification and inhibition of the ICE/CED-3 protease*  
1106 *necessary for mammalian apoptosis*. Nature, 1995. **376**(6535): p. 37-43.
- 1107 40. Vighi, E., et al., *Combination of cGMP analogue and drug delivery system*  
1108 *provides functional protection in hereditary retinal degeneration*. Proc Natl Acad  
1109 Sci U S A, 2018. **115**(13): p. E2997-e3006.
- 1110 41. Kaupp, U.B., et al., *Primary structure and functional expression from*  
1111 *complementary DNA of the rod photoreceptor cyclic GMP-gated channel*. Nature,  
1112 1989. **342**(6251): p. 762-6.
- 1113 42. Bocchero, U., et al., *Electrophysiological Changes During Early Steps of Retinitis*  
1114 *Pigmentosa*. Invest Ophthalmol Vis Sci, 2019. **60**(4): p. 933-943.
- 1115 43. McLatchie, L.M. and H.R. Matthews, *Voltage-dependent block by L-cis-diltiazem*  
1116 *of the cyclic GMP-activated conductance of salamander rods*. Proc Biol Sci, 1992.  
1117 **247**(1319): p. 113-9.
- 1118 44. Tang, L., et al., *Structural Basis for Diltiazem Block of a Voltage-gated Ca<sup>2+</sup>*  
1119 *Channel*. Mol Pharmacol, 2019.
- 1120 45. Zhao, Y., et al., *Molecular Basis for Ligand Modulation of a Mammalian Voltage-*  
1121 *Gated Ca(2+) Channel*. Cell, 2019. **177**(6): p. 1495-1506.e12.
- 1122 46. Frasson, M., et al., *Retinitis pigmentosa: rod photoreceptor rescue by a calcium-*  
1123 *channel blocker in the rd mouse*. Nat Med, 1999. **5**(10): p. 1183-7.



- 1124 47. Fain, G.L. and J.E. Lisman, *Light, Ca<sup>2+</sup>, and photoreceptor death: new evidence*  
1125 *for the equivalent-light hypothesis from arrestin knockout mice*. Invest Ophthalmol  
1126 Vis Sci, 1999. **40**(12): p. 2770-2.
- 1127 48. Olshevskaya, E.V., A.N. Ermilov, and A.M. Dizhoor, *Factors that affect regulation*  
1128 *of cGMP synthesis in vertebrate photoreceptors and their genetic link to human*  
1129 *retinal degeneration*. Mol Cell Biochem, 2002. **230**(1-2): p. 139-47.
- 1130 49. Molday, R.S., *Calmodulin regulation of cyclic-nucleotide-gated channels*. Curr  
1131 Opin Neurobiol, 1996. **6**(4): p. 445-52.
- 1132 50. Cadetti, L., et al., *Calcium-induced calcium release in rod photoreceptor terminals*  
1133 *boosts synaptic transmission during maintained depolarization*. Eur J Neurosci,  
1134 2006. **23**(11): p. 2983-90.
- 1135 51. Johnson, M.T., et al., *L-type Ca<sup>2+</sup>; channel blockers promote vascular remodeling*  
1136 *through activation of STIM proteins*. Proceedings of the National Academy of  
1137 Sciences, 2020. **117**(29): p. 17369.
- 1138 52. Saraiva, N., et al., *hGAAP promotes cell adhesion and migration via the*  
1139 *stimulation of store-operated Ca<sup>2+</sup> entry and calpain 2*. J Cell Biol, 2013. **202**(4):  
1140 p. 699-713.
- 1141 53. Bareil, C., et al., *Segregation of a mutation in CNGB1 encoding the beta-subunit*  
1142 *of the rod cGMP-gated channel in a family with autosomal recessive retinitis*  
1143 *pigmentosa*. Hum Genet, 2001. **108**(4): p. 328-34.
- 1144 54. Wissinger, B., et al., *CNGA3 mutations in hereditary cone photoreceptor*  
1145 *disorders*. Am J Hum Genet, 2001. **69**(4): p. 722-37.
- 1146 55. Chen, T.Y., et al., *A new subunit of the cyclic nucleotide-gated cation channel in*  
1147 *retinal rods*. Nature, 1993. **362**(6422): p. 764-7.
- 1148 56. Hüttel, S., et al., *Impaired channel targeting and retinal degeneration in mice*  
1149 *lacking the cyclic nucleotide-gated channel subunit CNGB1*. J Neurosci, 2005.  
1150 **25**(1): p. 130-8.
- 1151 57. Paquet-Durand, F., et al., *PKG activity causes photoreceptor cell death in two*  
1152 *retinitis pigmentosa models*. J Neurochem, 2009. **108**(3): p. 796-810.
- 1153 58. Wutz, K., et al., *Thirty distinct CACNA1F mutations in 33 families with incomplete*  
1154 *type of XLCSNB and Cacna1f expression profiling in mouse retina*. Eur J Hum  
1155 Genet, 2002. **10**(8): p. 449-56.
- 1156 59. Krizaj, D. and D.R. Copenhagen, *Compartmentalization of calcium extrusion*  
1157 *mechanisms in the outer and inner segments of photoreceptors*. Neuron, 1998.  
1158 **21**(1): p. 249-56.
- 1159 60. Spencer, M., P.B. Detwiler, and A.H. Bunt-Milam, *Distribution of membrane*  
1160 *proteins in mechanically dissociated retinal rods*. Invest Ophthalmol Vis Sci, 1988.  
1161 **29**(7): p. 1012-20.



- 1162 61. Sanyal, S. and A.K. Bal, *Comparative light and electron microscopic study of*  
1163 *retinal histogenesis in normal and rd mutant mice*. *Z Anat Entwicklungsgesch*,  
1164 1973. **142**(2): p. 219-38.
- 1165 62. Mank, M., et al., *A FRET-Based Calcium Biosensor with Fast Signal Kinetics and*  
1166 *High Fluorescence Change*. *Biophysical Journal*, 2006. **90**(5): p. 1790-1796.
- 1167 63. Korschen, H.G., et al., *A 240 kDa protein represents the complete beta subunit of*  
1168 *the cyclic nucleotide-gated channel from rod photoreceptor*. *Neuron*, 1995. **15**(3):  
1169 p. 627-36.
- 1170 64. Yu, W.P., M.E. Grunwald, and K.W. Yau, *Molecular cloning, functional expression*  
1171 *and chromosomal localization of a human homolog of the cyclic nucleotide-gated*  
1172 *ion channel of retinal cone photoreceptors*. *FEBS Lett*, 1996. **393**(2-3): p. 211-5.
- 1173 65. Peng, C., et al., *Functionally important calmodulin-binding sites in both NH<sub>2</sub>- and*  
1174 *COOH-terminal regions of the cone photoreceptor cyclic nucleotide-gated channel*  
1175 *CNGB3 subunit*. *J Biol Chem*, 2003. **278**(27): p. 24617-23.
- 1176 66. Liman, E.R., J. Tytgat, and P. Hess, *Subunit stoichiometry of a mammalian K<sup>+</sup>*  
1177 *channel determined by construction of multimeric cDNAs*. *Neuron*, 1992. **9**(5): p.  
1178 861-71.
- 1179 67. Shammat, I.M. and S.E. Gordon, *Stoichiometry and arrangement of subunits in*  
1180 *rod cyclic nucleotide-gated channels*. *Neuron*, 1999. **23**(4): p. 809-19.
- 1181 68. Jonas, P., *High-speed solution switching using piezo-based micropositioning*  
1182 *stages.*, in *Single-channel recording*, B. Sakmann and E. Neher, Editors. 1995,  
1183 Plenum Press: New York. p. xxii, 700 p.
- 1184 69. Thon, S., et al., *Conformational Flip of Nonactivated HCN2 Channel Subunits*  
1185 *Evoked by Cyclic Nucleotides*. *Biophys J*, 2015. **109**(11): p. 2268-76.
- 1186 70. Zheng, J. and W.N. Zagotta, *Patch-clamp fluorometry recording of conformational*  
1187 *rearrangements of ion channels*. *Sci STKE*, 2003. **2003**(176): p. PI7.
- 1188 71. Nache, V., et al., *Differential regulation by cyclic nucleotides of the CNGA4 and*  
1189 *CNGB1b subunits in olfactory cyclic nucleotide-gated channels*. *Sci Signal*, 2012.  
1190 **5**(232): p. ra48.
- 1191 72. Au - Belhadj, S., et al., *Long-Term, Serum-Free Cultivation of Organotypic Mouse*  
1192 *Retina Explants with Intact Retinal Pigment Epithelium*. *JoVE*, 2020(165): p.  
1193 e61868.
- 1194 73. Hair, J.F., et al., *Multivariate data analysis* New York. NY: Macmillan, 1995.
- 1195 74. Nobre, J.S. and J. da Motta Singer, *Residual analysis for linear mixed models*.  
1196 *Biom J*, 2007. **49**(6): p. 863-75.
- 1197 75. Kulkarni, M., et al., *Imaging Ca<sup>2+</sup> dynamics in cone photoreceptor axon terminals*  
1198 *of the mouse retina*. *J Vis Exp*, 2015(99): p. e52588.
- 1199 76. Euler, T., et al., *EyeCup scope--optical recordings of light stimulus-evoked*  
1200 *fluorescence signals in the retina*. *Pflugers Arch*, 2009. **457**(6): p. 1393-414.

- 1201 77. Baden, T., et al., *A tale of two retinal domains: near-optimal sampling of*  
1202 *achromatic contrasts in natural scenes through asymmetric photoreceptor*  
1203 *distribution*. Neuron, 2013. **80**(5): p. 1206-17.
- 1204 78. Nakagawa, S. and H. Schielzeth, *A general and simple method for obtaining R2*  
1205 *from generalized linear mixed-effects models*. Methods in Ecology and Evolution,  
1206 2013. **4**(2): p. 133-142.
- 1207

1208 **ACKNOWLEDGEMENTS**

1209 We thank N. Rieger from the Tübingen Institute for Ophthalmic Research as well as  
1210 K. Schoknecht, S. Bernhardt, A. Kolchmeier from Institute of Physiology II (Jena) for  
1211 technical assistance. We thank also J. Kusch for excellent comments on the manuscript.  
1212 This work was funded by the ProRetina Foundation and the Deutsche  
1213 Forschungsgemeinschaft (DFG, German Research Foundation; PA1751/7-1, 8-1 to  
1214 FPD; EU42/8-1 to TE; TRR 166 ReceptorLight project B01 and Project Number  
1215 437036164 to VN).

1216 **Author contributions**

1217 SD performed retinal explant cultures, TUNEL and immunostaining, microscopy,  
1218 analysed data and helped write the manuscript; MP performed Ca<sup>2+</sup>-imaging  
1219 experiments; VP studied the effect of diltiazem on the CNGC activation and deactivation  
1220 kinetics; KG performed colocalization experiments for heterotetrameric CNGC; CM  
1221 performed molecular-biology work; MA performed immunostaining and analysed data;  
1222 LR analysed Ca<sup>2+</sup>-imaging data and performed statistical analysis; TS performed  
1223 statistical analysis on immuno and bioassay data; FS synthesized fluorescent cGMP  
1224 derivatives; VN performed electrophysiological and optical measurements to study the  
1225 effect of diltiazem on retinal CNGC; VN, TE, and FPD designed the experiments,  
1226 interpreted the data, and prepared the manuscript. All authors edited the manuscript.

1227  
1228  
1229  
1230

**SUPPLEMENTARY INFORMATION for:**

**Das et al.: Redefining the role of Ca<sup>2+</sup>-permeable channels in hereditary photoreceptor degeneration using the D- and L-cis enantiomers of diltiazem**

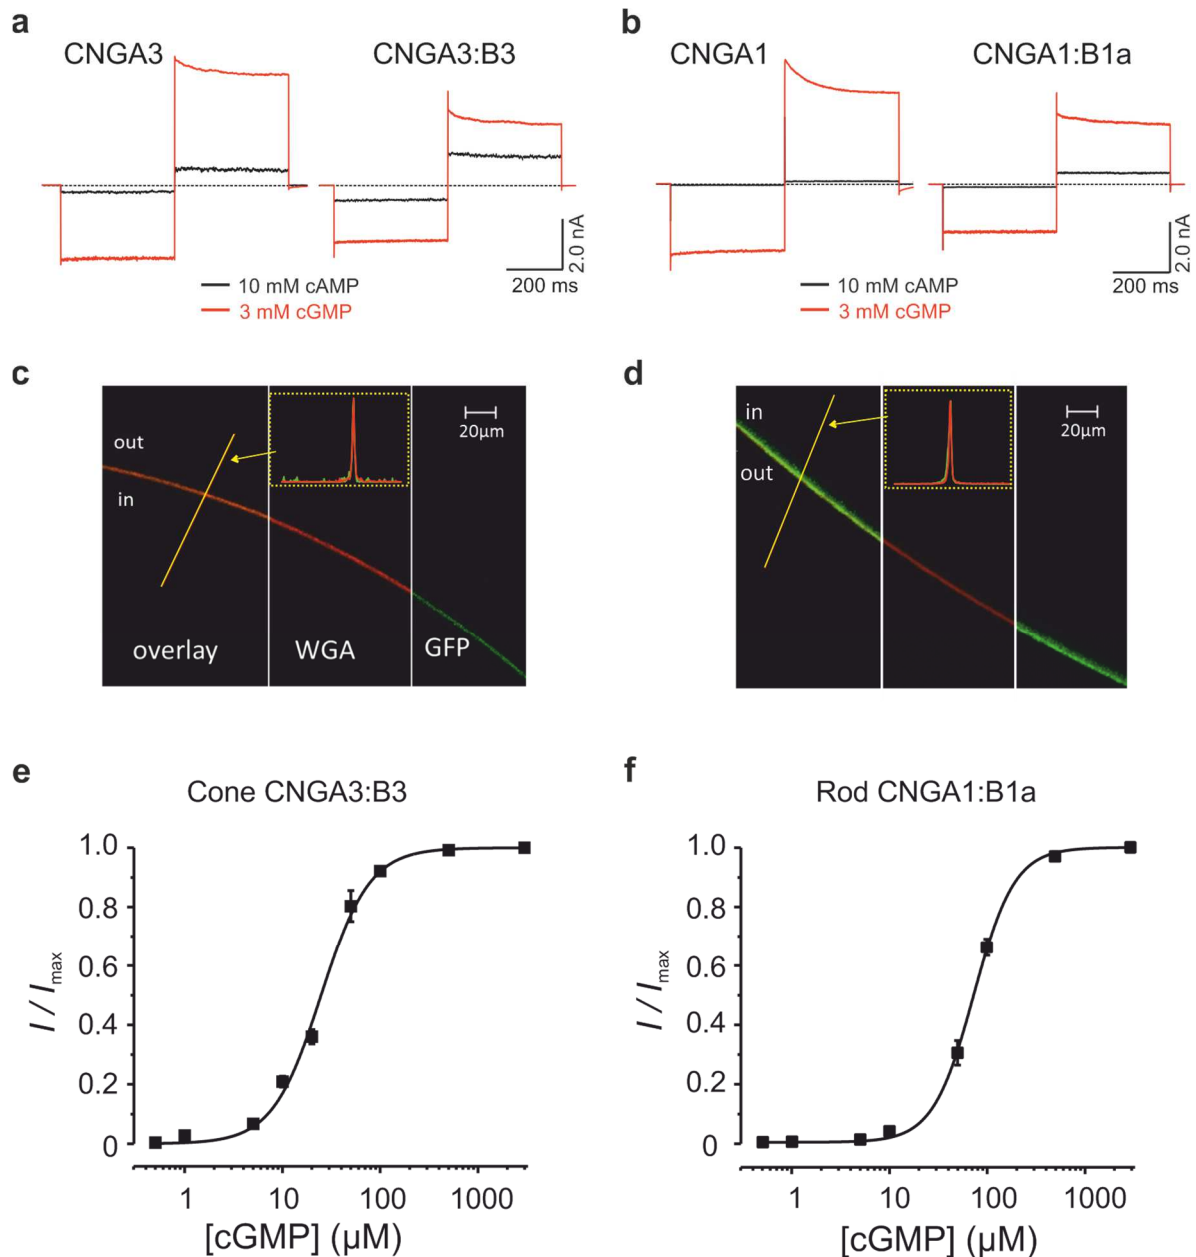

1231  
1232  
1233  
1234

1235 **Supplementary Fig. 1: Functional properties of photoreceptor heterotetrameric**  
1236 **CNGCs expressed in *Xenopus laevis* oocytes.** Representative macroscopic cone (a)  
1237 and rod (b) CNGC-current traces from inside-out membrane patches in the presence of  
1238 3 mM cGMP (red) and 10 mM cAMP (black). The current traces were elicited by voltage  
1239 steps from a holding potential of 0 mV to -100, +100 and 0 mV. Leak currents in the  
1240 absence of cGMP were subtracted for all recordings. For CNGA3 channels the ratio  
1241  $I_{cAMP}/I_{cGMP}$  was  $0.15 \pm 0.01$  (n=8). CNGB3-subunit incorporation into the CNGA3:B3

1242 channel leads to a significant increase in the cAMP efficacy ( $I_{cAMP}/I_{cGMP}=0.42\pm0.03$ ,  $n=6$ ).  
1243 Similarly, for CNGA1 channels the ratio  $I_{cAMP}/I_{cGMP}$  was  $0.019\pm0.005$  ( $n=12$ ), whereas for  
1244 heterotetrameric CNGA1:B1a channels the ratio was  $0.16\pm0.02$  ( $n=6$ ). (c, d)  
1245 Representative measurements showing confocal images of oocyte membrane  
1246 expressing heterotetrameric CNGA3:B3-GFP (c) and CNGA1:B1a-GFP (d) channels  
1247 (green fluorescence signal). The oocyte plasma membrane was labelled with Alexa  
1248 Fluor™ 633 WGA (red fluorescence signal). The small insets show fluorescence profiles  
1249 along the yellow line, perpendicular to the membrane and confirm the colocalization of  
1250 the labelled channels with the oocyte membrane. For each channel isoform we tested  
1251 more than 10 oocytes from at least two different oocyte batches. (e, f) cGMP-dependent  
1252 concentration-activation relationships for cone CNGA3:B3 (e) and rod CNGA1:B1a (f)  
1253 channels obtained at -35 mV. The currents triggered by subsaturating ligand  
1254 concentrations were normalized with respect to the maximal current at 3 mM cGMP. The  
1255 experimental data points, each representing the mean of 5 to 10 measurements, were  
1256 fitted with Eq. (1). The parameters obtained are included in Table 1.

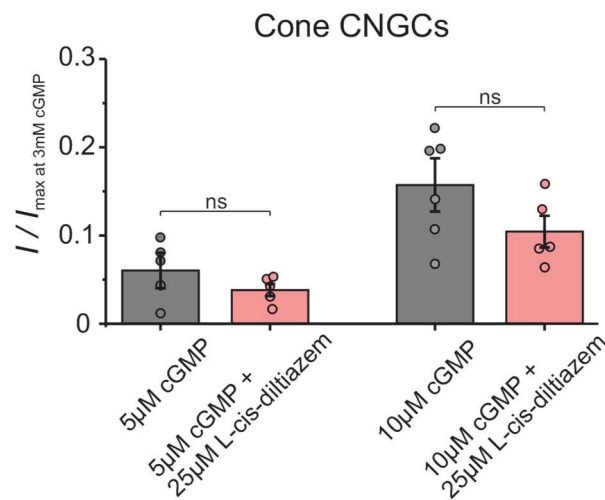

1257

1258 **Supplementary Fig. 2: L-cis-diltiazem does not influence the activity of cone**  
1259 **CNGCs under physiological conditions.** The normalized cone CNGC currents were  
1260 triggered by either 5 µM or 10 µM cGMP (black columns) in the presence and in the  
1261 absence of 25 µM L-cis-diltiazem (light-red columns). The measurements were  
1262 performed under steady-state conditions, at -35 mV. We observed no statistical  
1263 difference between the experiments with and without the blocker. The results obtained  
1264 with the two-tailed unpaired Student *t*-test were the following: (1) for 10 µM cGMP and  
1265 10 µM cGMP + 25 µM L-cis-diltiazem the p-value was 0.1667; (2) for 5 µM cGMP and 5  
1266 µM cGMP + 25 µM L-cis-diltiazem the p-value was 0.2256.

1267

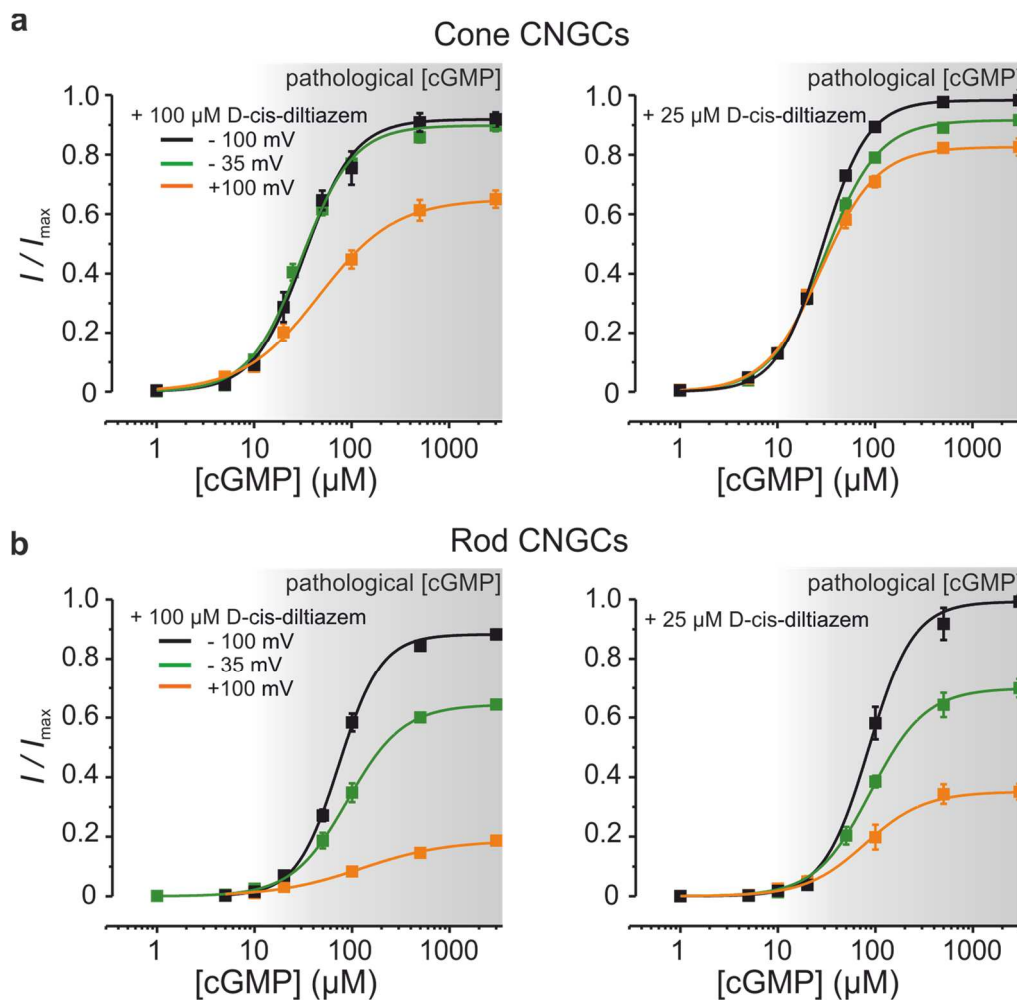

1268

1269

1270

1271

1272

1273

1274

1275

1276

**Supplementary Fig. 3: Voltage dependence of D-cis-diltiazem-induced inhibition of photoreceptor CNGCs.** (a, b) cGMP-dependent concentration-activation relationships for cone (a) and rod (b) CNGCs in the presence of 100  $\mu\text{M}$  (left) and 25  $\mu\text{M}$  (right) D-cis-diltiazem, measured at: -100 mV (black symbols), -35 mV (green symbols) and +100 mV (orange symbols). The current amplitudes were normalized with respect to the saturating currents measured in the absence of diltiazem at each individual voltage. The experimental data points were fitted with the Hill equation (Eq. 1). All parameters obtained from the fits are included in Table 1.

1277

1278

1279

1280

1281

1282

1283

1284

1285



1286

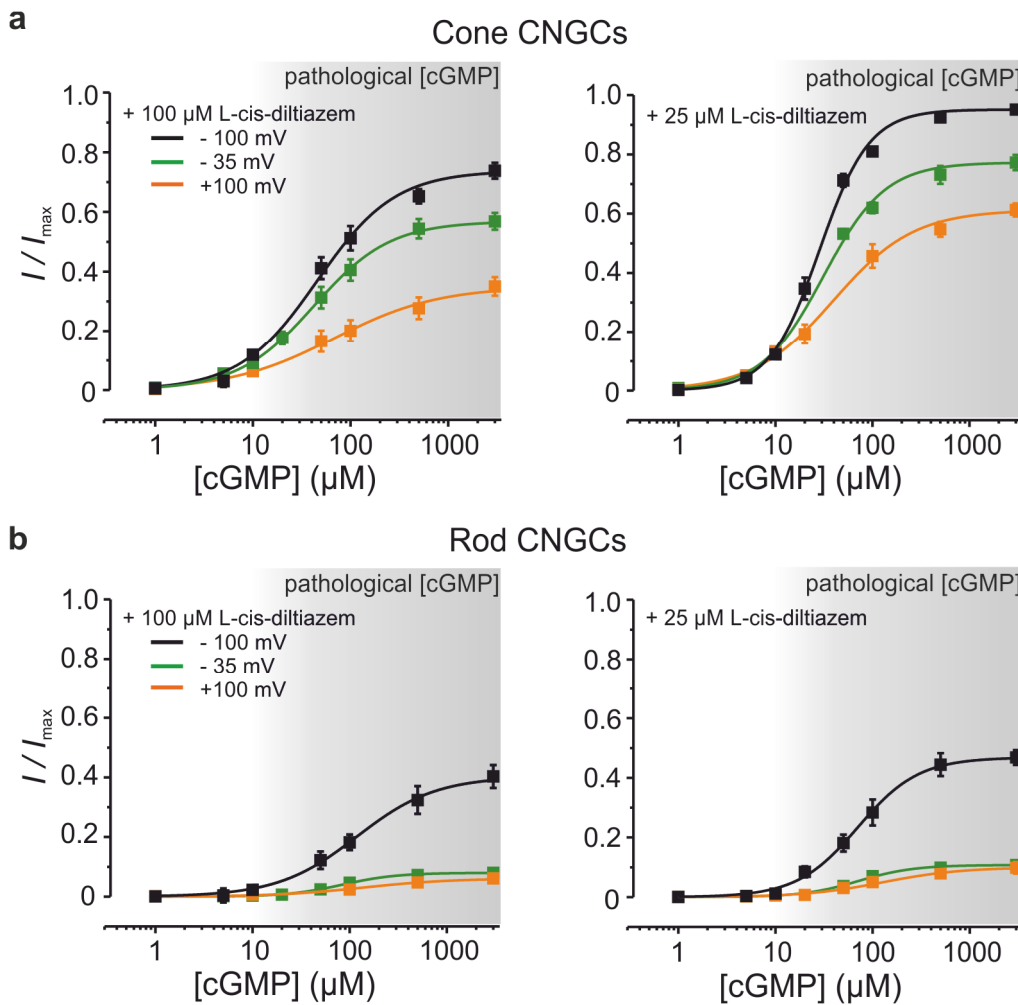

1303 **Supplementary Fig. 4: Voltage dependence of L-cis-diltiazem-induced inhibition of**  
1304 **photoreceptor CNGCs. (a, b)** cGMP-dependent concentration-activation relationships  
1305 for heterotetrameric cone (a) and rod (b) CNGCs in the presence of 100  $\mu\text{M}$  (left) and 25  
1306  $\mu\text{M}$  (right) L-cis-diltiazem, measured at: -100 mV (black symbols), -35 mV (green  
1307 symbols) and +100 mV (orange symbols). The current amplitudes were normalized with  
1308 respect to the saturating currents measured in the absence of diltiazem at each individual  
1309 voltage. The experimental data points were fitted with the Hill equation (Eq. 1). All  
1310 parameters obtained from the fits are included in Table1.

1311

1312

1313

1314

1315

1316

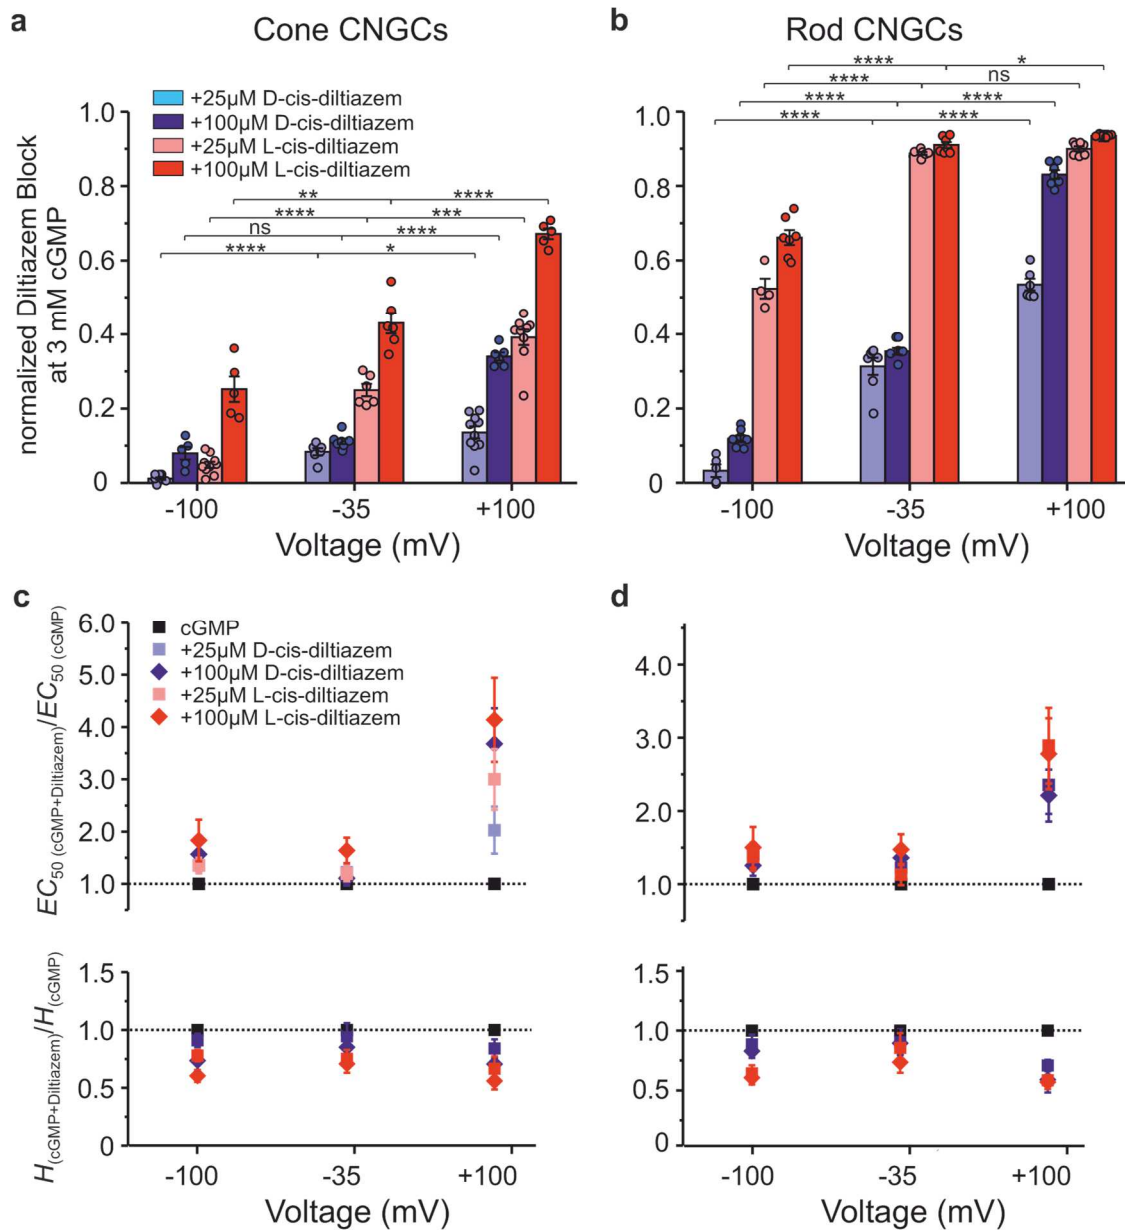

1317

1318 **Supplementary Fig. 5: Differential effect of D-cis- and L-cis-diltiazem on CNGC's**  
 1319 **activity and apparent affinity. (a, b)** D- and L-cis-diltiazem - block of cone and  
 1320 CNGCs activity triggered by saturating cGMP at three different voltages. The amount of  
 1321 diltiazem block was calculated using Eq. 2. **(c, d)** Effect of D- and L-cis-diltiazem on the  
 1322 channel's apparent affinity. Shown are the  $EC_{50(cGMP+Diltiazem)}/EC_{50(cGMP)}$ - and  
 1323  $H_{(cGMP+Diltiazem)}/H_{(cGMP)}$  ratios in the presence of 25 μM or 100 μM D- or L-cis-Diltiazem  
 1324 at -100 mV, -35 mV and +100 mV. The  $EC_{50}$ - and  $H$ -values were obtained from the  
 1325 concentration-activation relationships shown in Fig. 1 and Supplementary Figs. 3,4 (see  
 1326 also Table 1). For the statistical analysis on of the effect of diltiazem on  $EC_{50}$ - and  $H$ -  
 1327 values see Supplementary Table 1.

1328

1329

1330

| mV   | cone CNGC:                  |          | p-value                       |          |                             |          |                               |          |
|------|-----------------------------|----------|-------------------------------|----------|-----------------------------|----------|-------------------------------|----------|
|      | cGMP + 25µM D-cis-diltiazem |          | cGMP + 100 µM D-cis-diltiazem |          | cGMP + 25µM L-cis-diltiazem |          | cGMP + 100 µM L-cis-diltiazem |          |
|      | <i>EC</i> <sub>50</sub>     | <i>H</i> | <i>EC</i> <sub>50</sub>       | <i>H</i> | <i>EC</i> <sub>50</sub>     | <i>H</i> | <i>EC</i> <sub>50</sub>       | <i>H</i> |
| -35  | 0.04242                     | ns       | ns                            | ns       | ns                          | 0.00677  | 0.00277                       | 0.00295  |
| -100 | 0.00042                     | ns       | 0.000527                      | 0.00934  | 0.000291                    | 0.00121  | 0.000153                      | <0.0001  |
| +100 | 0.000151                    | ns       | 0.00103                       | 0.01494  | 0.00222                     | ns       | 0.01297                       | 0.00636  |
|      | rod CNGC:                   |          | p-value                       |          |                             |          |                               |          |
|      | <i>EC</i> <sub>50</sub>     | <i>H</i> | <i>EC</i> <sub>50</sub>       | <i>H</i> | <i>EC</i> <sub>50</sub>     | <i>H</i> | <i>EC</i> <sub>50</sub>       | <i>H</i> |
| -35  | ns                          | ns       | 0.02422                       | ns       | ns                          | ns       | 0.02159                       | 0.02111  |
| -100 | 0.00534                     | ns       | 0.04734                       | ns       | 0.01729                     | 0.00055  | ns                            | 0.00012  |
| +100 | <0.0001                     | <0.0001  | <0.0001                       | <0.0001  | <0.0001                     | <0.0001  | <0.0001                       | <0.0001  |

1331

1332 **Supplementary Table 1:** Statistical analysis of the effect of diltiazem on CNGC *EC*<sub>50</sub>-  
 1333 and *H*-values at different voltages. The respective parameters and number of  
 1334 experiments are listed in Table 1. The *EC*<sub>50</sub> and *H*-values in the presence of cGMP only  
 1335 were compared with the respective values in presence of cGMP and diltiazem.

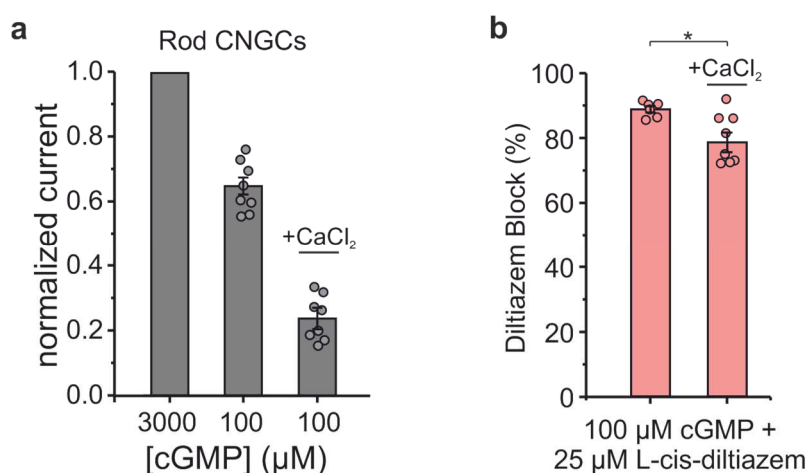

1336

1337 **Supplementary Fig. 6: Effect of Ca<sup>2+</sup> on the blocking effect of L-cis-diltiazem on**  
 1338 **rod CNGCs.** (a) The diagram shows normalized rod CNGCs current triggered by 100  
 1339 µM cGMP, in the absence and in the presence of 1 mM CaCl<sub>2</sub> in the extracellular solution.  
 1340 The current at 100 µM was normalized with respect to the current in the presence of 3  
 1341 mM cGMP, under the respective CaCl<sub>2</sub>-conditions (n=9). The channel response to cGMP  
 1342 is much weaker in the presence of Ca<sup>2+</sup> (*I*<sub>cGMP+CaCl<sub>2</sub></sub>/*I*<sub>max</sub> = 0.233±0.03) as it is in its  
 1343 absence (*I*/*I*<sub>max</sub> = 0.65±0.026). (b) L-cis-diltiazem - block of rod CNGC activity triggered  
 1344 by 100 µM cGMP in either the presence or absence of Ca<sup>2+</sup>. The amount of diltiazem  
 1345 block was calculated using Eq. 2. The two-tailed unpaired Student *t*-test was used for the  
 1346 statistical analysis: \**p*=0.034.

1347

1348

1349

1350

1351

1352

1353

1354  
1355  
1356  
1357  
1358  
1359  
1360  
1361

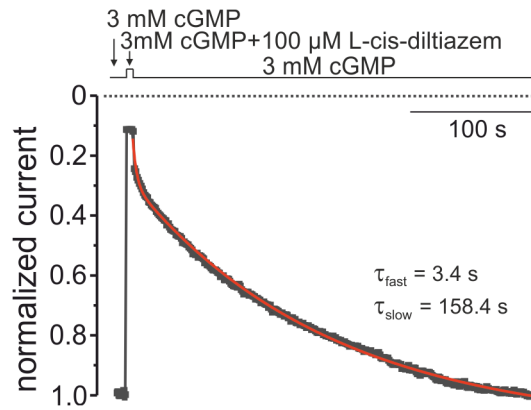

1362 **Supplementary Fig. 7: Kinetics of L-cis-diltiazem removal.** Normalized rod CNGC  
1363 current triggered by 3 mM cGMP, before, during and after the removal of 100 μM L-cis-  
1364 diltiazem. The current trace represents the mean of 5 measurements. The individual data  
1365 points (black symbols) were connected by lines and were obtained under steady-state  
1366 conditions, at -35 mV. The experimental protocol is depicted on top of the diagram. The  
1367 time course of current recovery, which mirrors the L-cis-diltiazem removal, was fitted by  
1368 a double-exponential function (red line, Eq. 4) yielding the following time constants:  $\tau_{fast}$   
1369 = 3.4 s and  $\tau_{slow} = 158.4$  s.  
1370

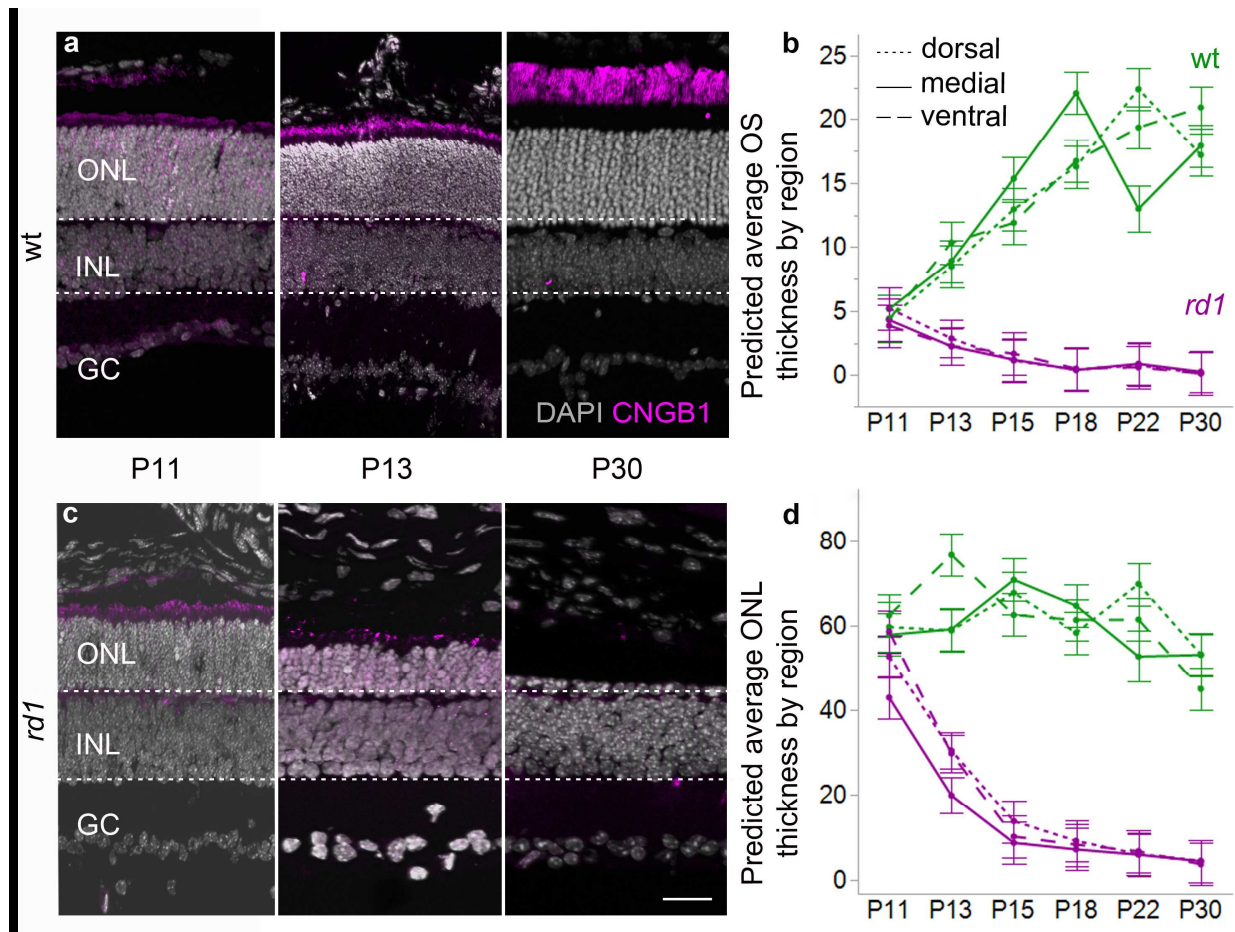

1371

1372 **Supplementary Fig. 8: ONL thickness and CNGC expression during *rd1* retinal**  
 1373 **degeneration.** Immunostaining for CNGB1a (magenta) was performed at different post-  
 1374 natal (P) days in wild-type (wt) and *rd1* retina (a,c). The nuclear counterstain (DAPI, grey)  
 1375 indicates outer nuclear layer (ONL), inner nuclear layer (INL), and ganglion cell layer  
 1376 (GC). Dotted, solid and dashed lines in the graph represent dorsal, medial, and ventral  
 1377 mouse retina respectively (b,d). (a) In wt retina, CNGB1a immunostaining labelled the  
 1378 photoreceptor outer segments, which grew longer from P11 to P30. (c) In *rd1* retina,  
 1379 CNGB1a positive outer segments were visible at P11 and P13 but essentially  
 1380 disappeared by P30. (d) The thickness of the ONL in wt retina (green) remained approx.  
 1381 constant between P11 and P30, while *rd1* (magenta) ONL size rapidly diminished after  
 1382 P11. (b) Outer segments in wt retina grew longer from P11 to P24 until reaching a plateau  
 1383 at a length of approx. 20  $\mu\text{m}$ . In contrast, *rd1* outer segments, while still comparable to  
 1384 wt at P11, had decreased in length to nearly 0  $\mu\text{m}$  by P24. Images and quantification  
 1385 were obtained from retinal sections from 4-5 different animals per time-point and  
 1386 genotype. Scale bar = 30  $\mu\text{m}$ .

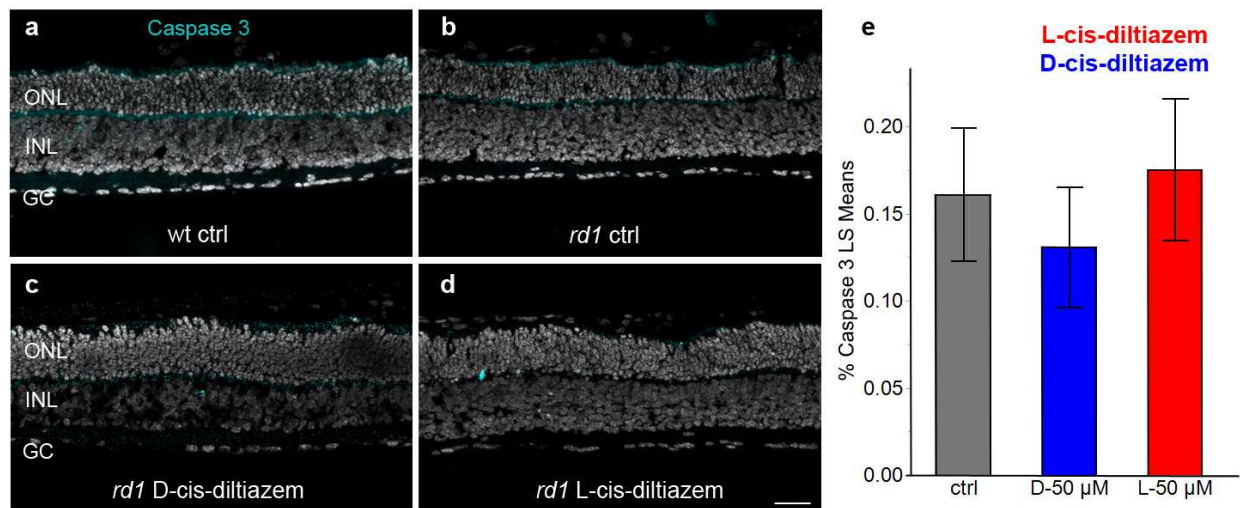

1387

1388 **Supplementary Fig. 9: Absence of apoptotic marker during photoreceptor**  
1389 **degeneration.** Immunostaining for cleaved, activated caspase-3 (turquoise) was  
1390 performed on *rd1* retinal sections treated with D- and L-cis-diltiazem (50 μM). While  
1391 caspase-3 immunoreactivity was occasionally found in both outer and inner nuclear layer  
1392 (ONL, INL), the percentage of caspase-3 positive cells was far lower than the numbers  
1393 of dying cells (*cf.* Fig. 6). Scale bar = 50 μm.

1394

1395
